# Supplementary material for: The link between osteoporosis and frozen shoulder: exploring the therapeutic effect of TAK715 on reversing fibrosis and protecting against osteoporosis via the p38 MAPK signaling pathway
Source: PubMed Central journal article supplement — BMC Musculoskelet Disord. 2024 Nov 21;25:942. doi: 10.1186/s12891-024-08068-8 (PMC11580655; doi:10.1186/s12891-024-08068-8), 2024-11-21

Supporting information for Western-blot analysis

WB figures in figure3 E

WB marker

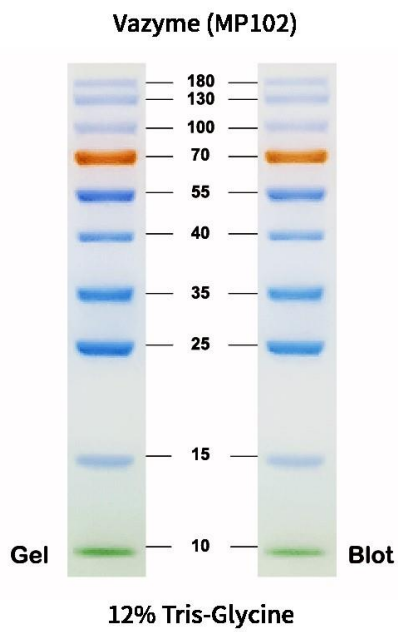

Collagen- I

CON CON CON FS FS FS FS CON FS CON

150kD

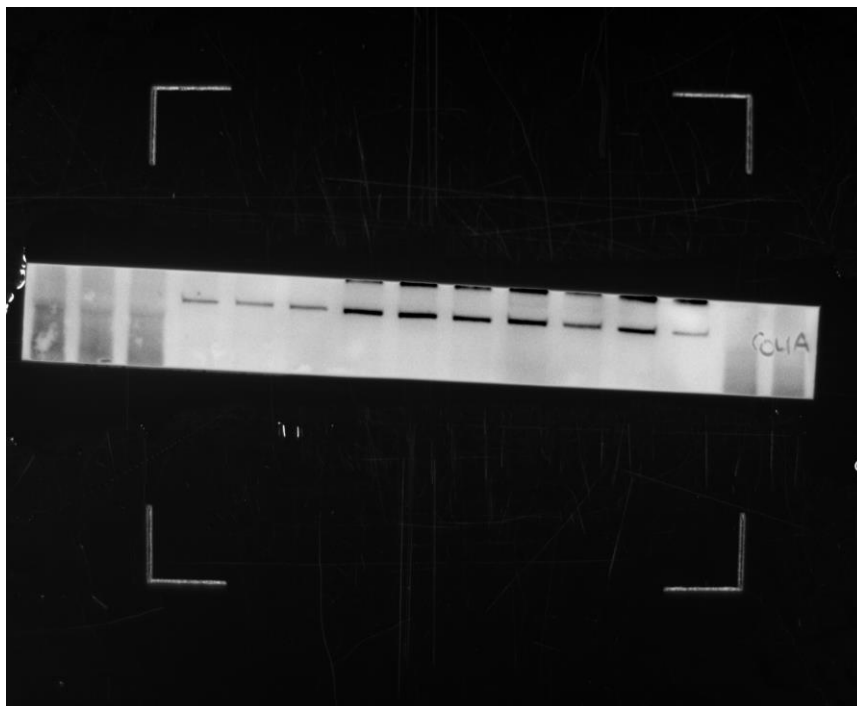

180kDa  
130kDa

**Collagen-III**

CON CON CON FS FS FS FS CON FS CON

137kD

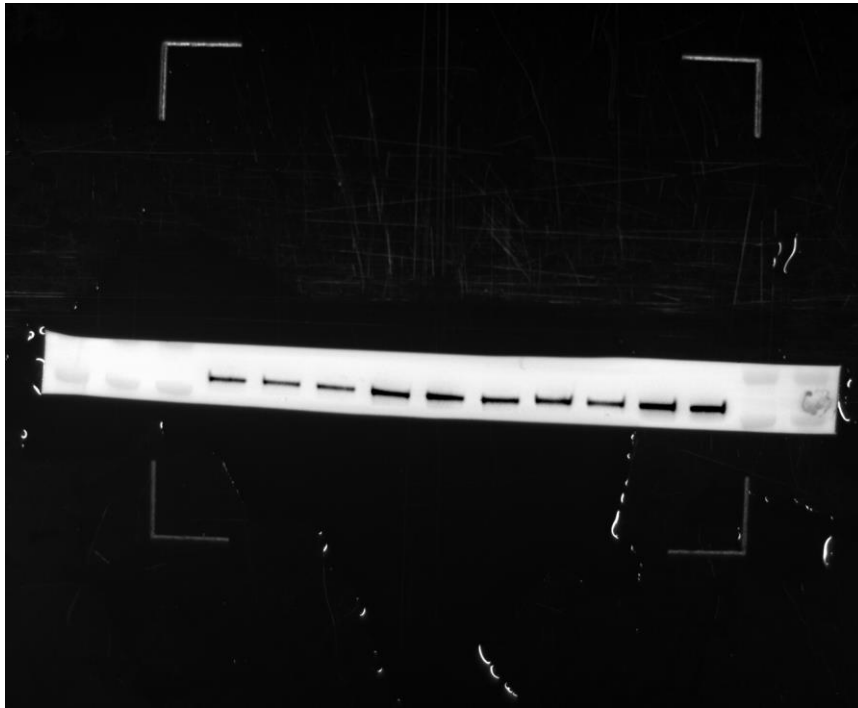

180kDa  
130kDa

**Collagen-III**

**p-p38**

CON CON CON FS FS FS CON CON FS FS

43kDa

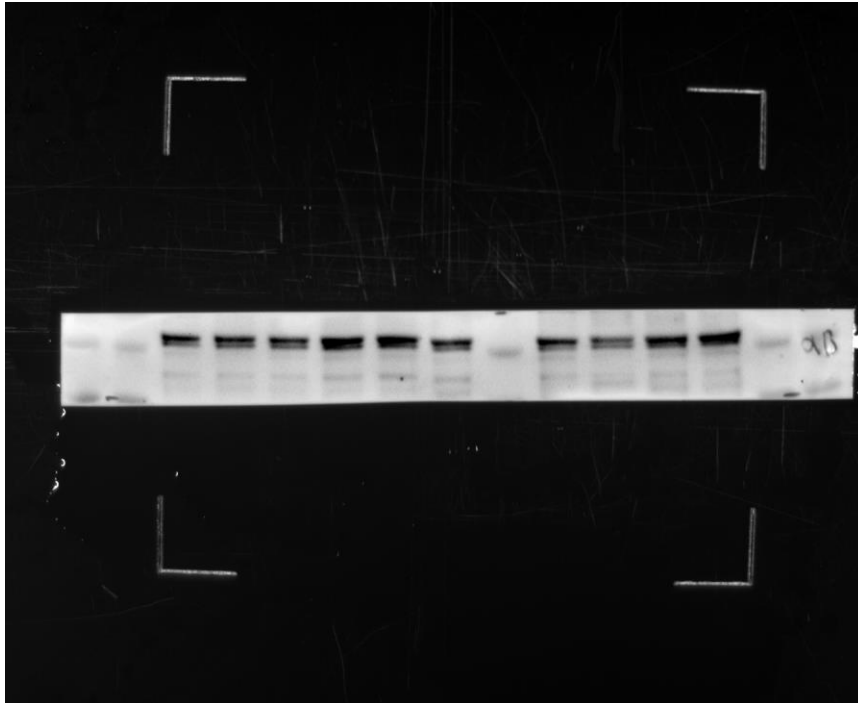

40kDa  
35kDa

CON FS CON FS

43kDa

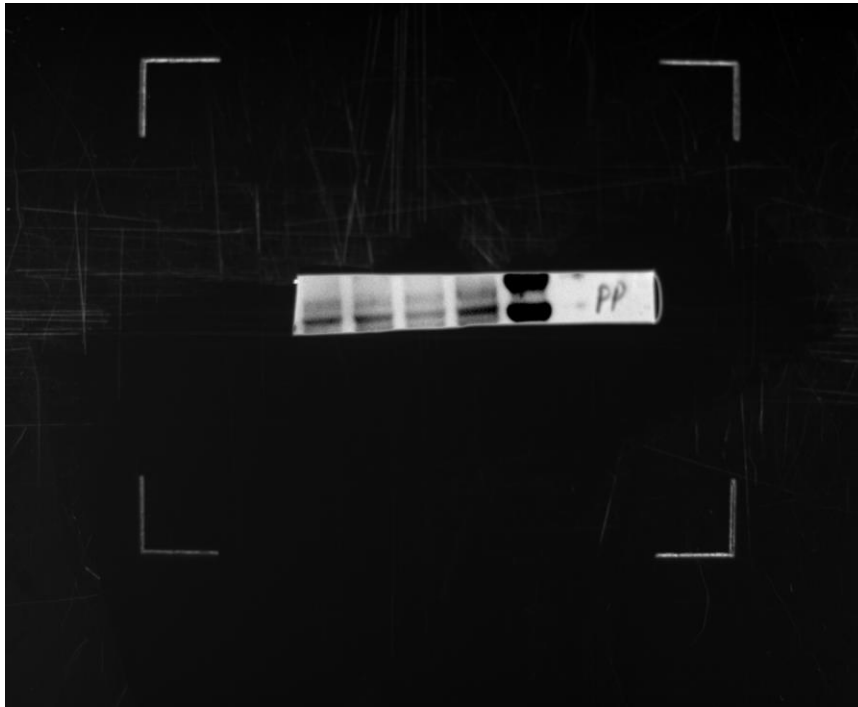

55kDa  
40kDa

CON CON CON FS FS FS FS CON FS CON

43kDa

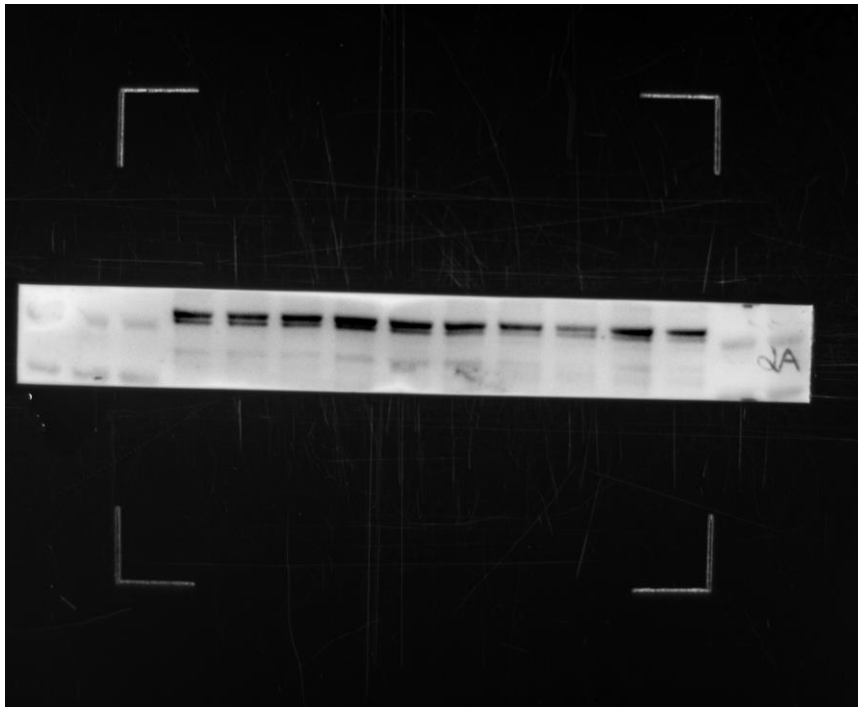

40kDa  
35kDa

p38

CON CON CON FS FS FS

43kDa

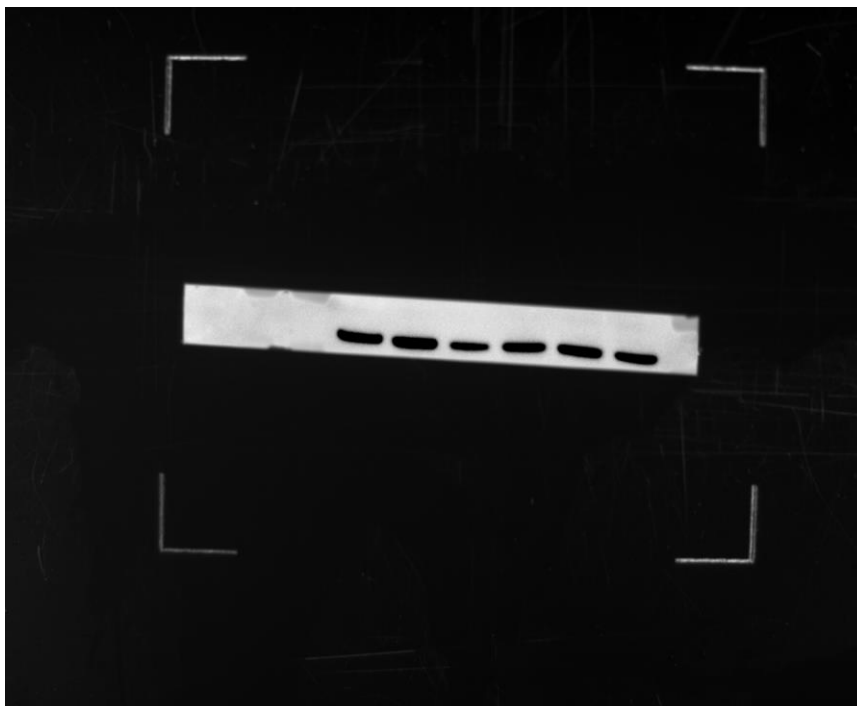

55KDa  
40KDa

CON CON CON FS FS FS

CON CON FS FS

43kDa

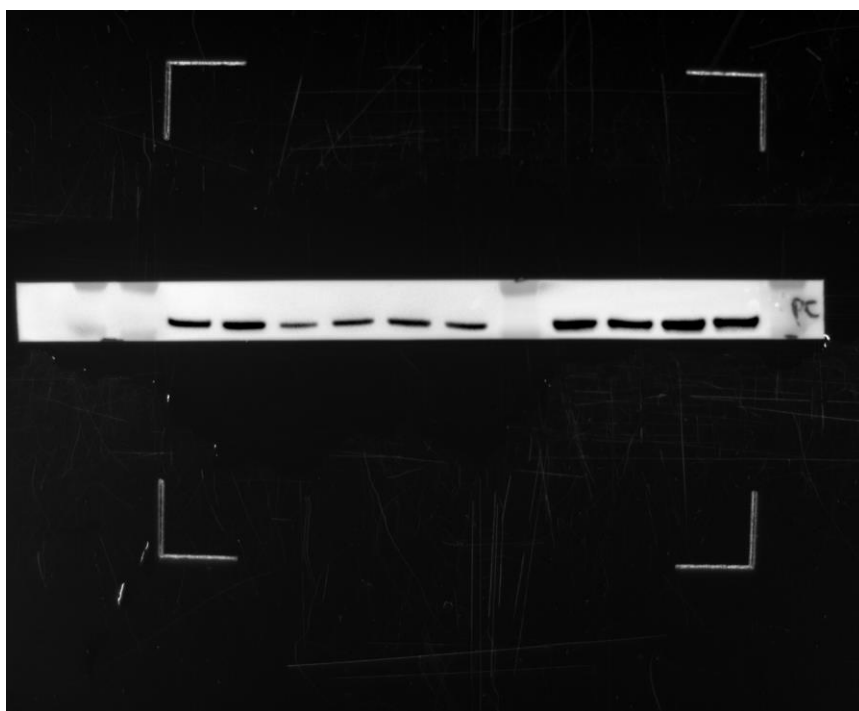

55KDa  
40kDa

CON CON FS FS

43kDa

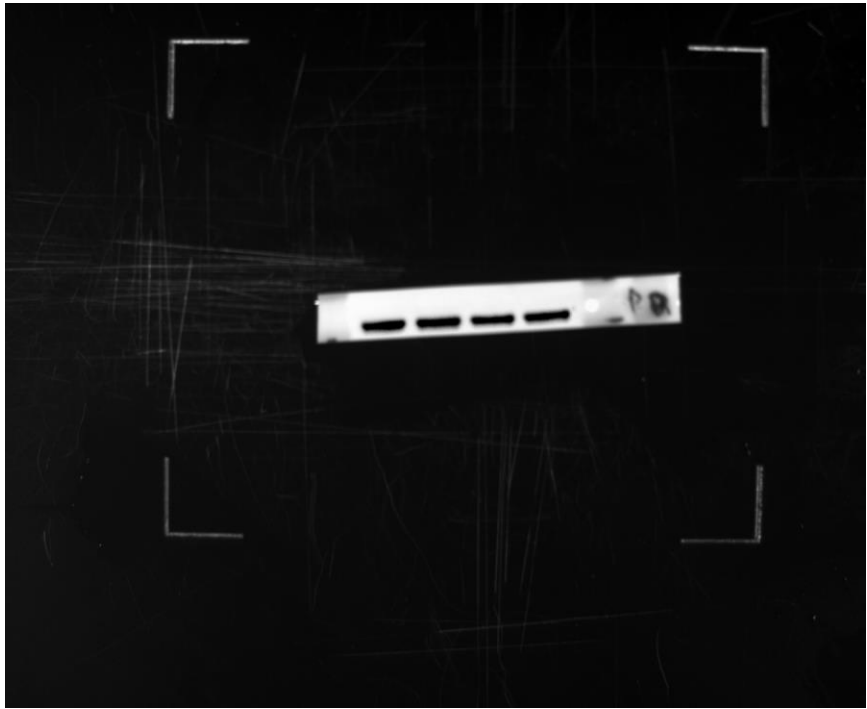

55KDa  
40KDa

**Caspase-3**

CON FS

33kDa

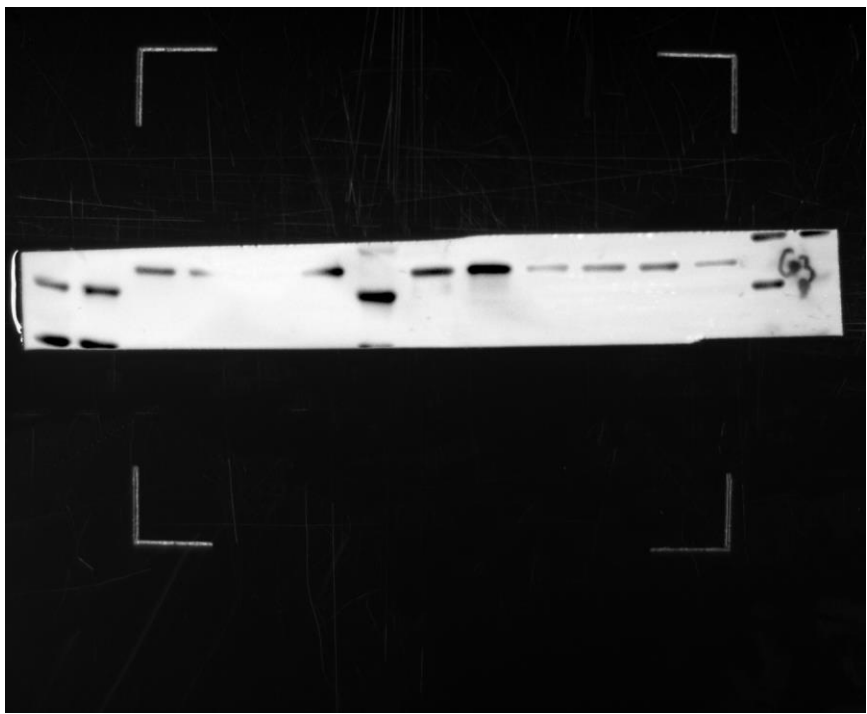

40KDa  
35KDa

CON FS

CON FS

33kDa

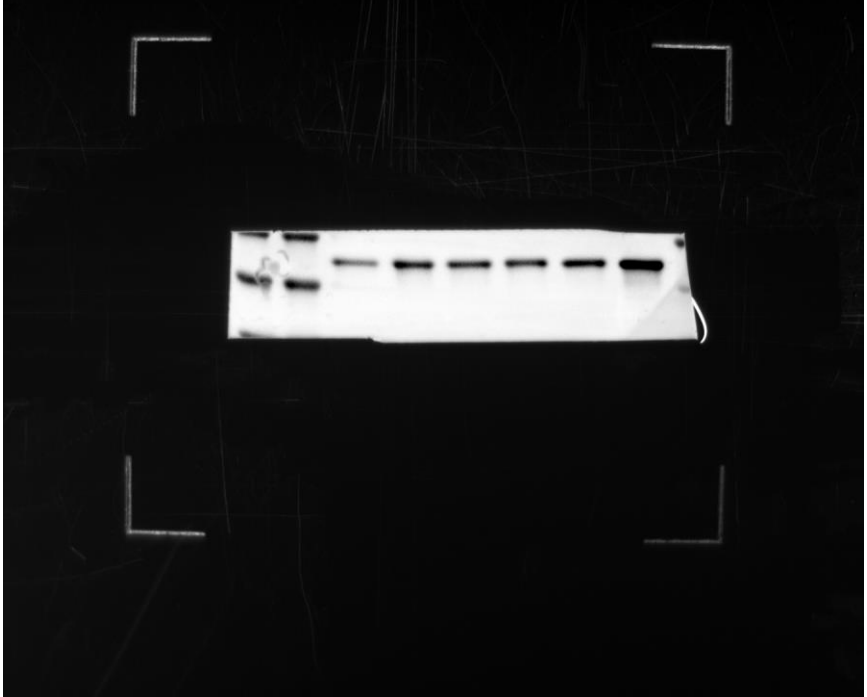

40KDa  
35KDa

**Bax**

CON FS CON FS

20kDa

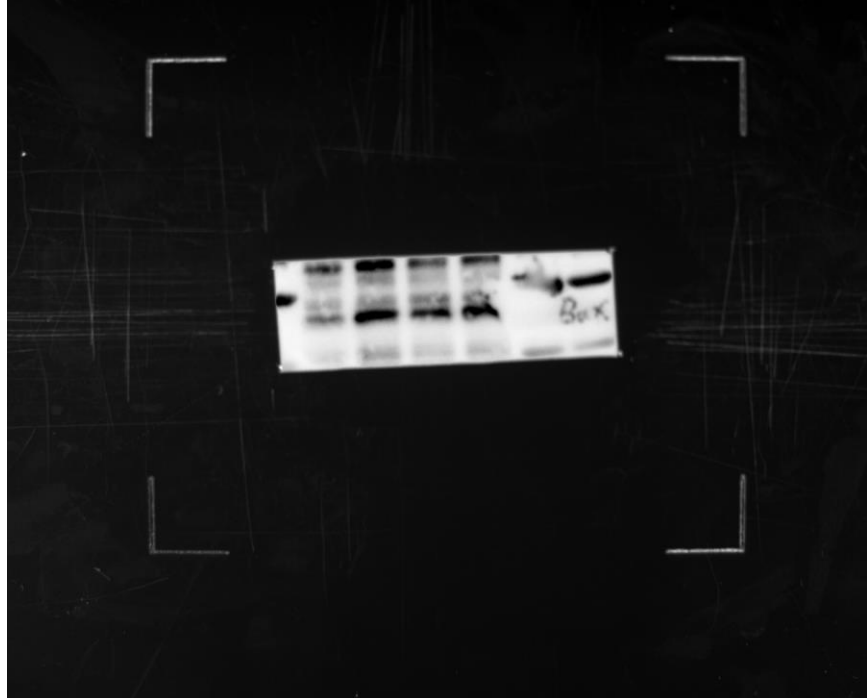

25kDa  
15kDa

CON FS      CON FS

20kDa

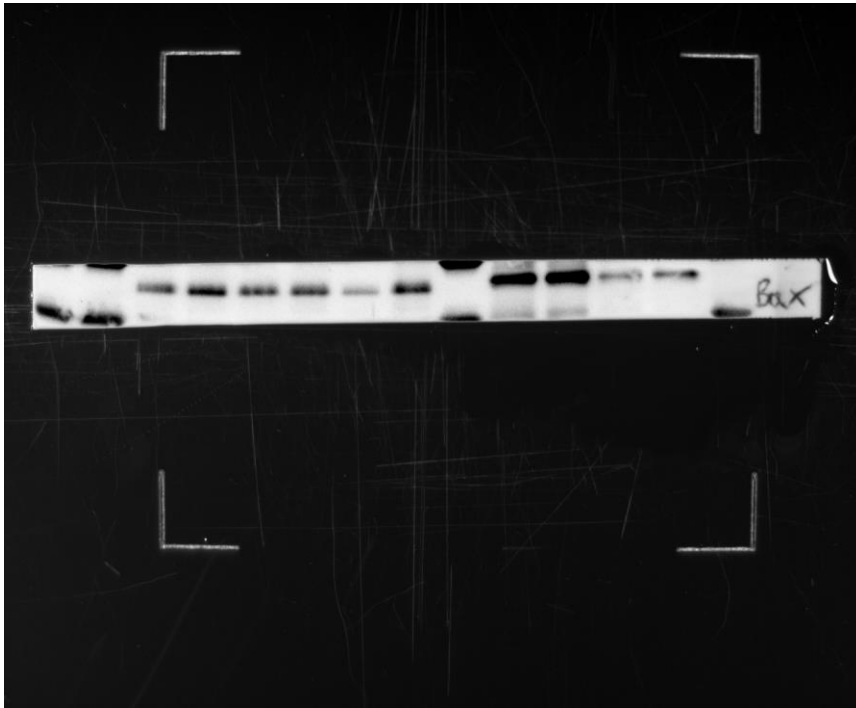

25kDa  
15kDa

CON FS CON FS

20kDa

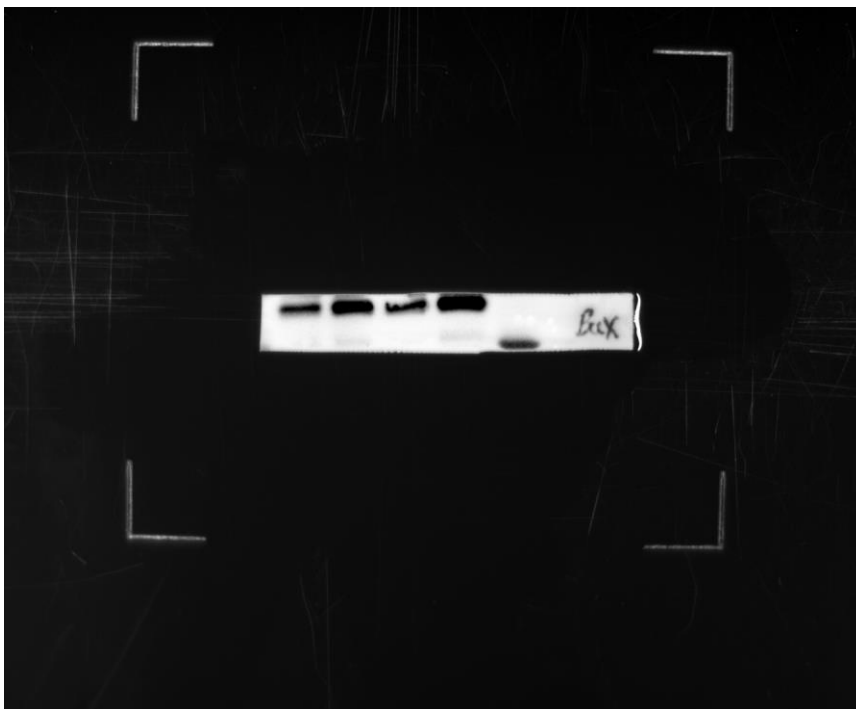

15kDa

GADPH

CON CON CON FS FS FS

36kDa

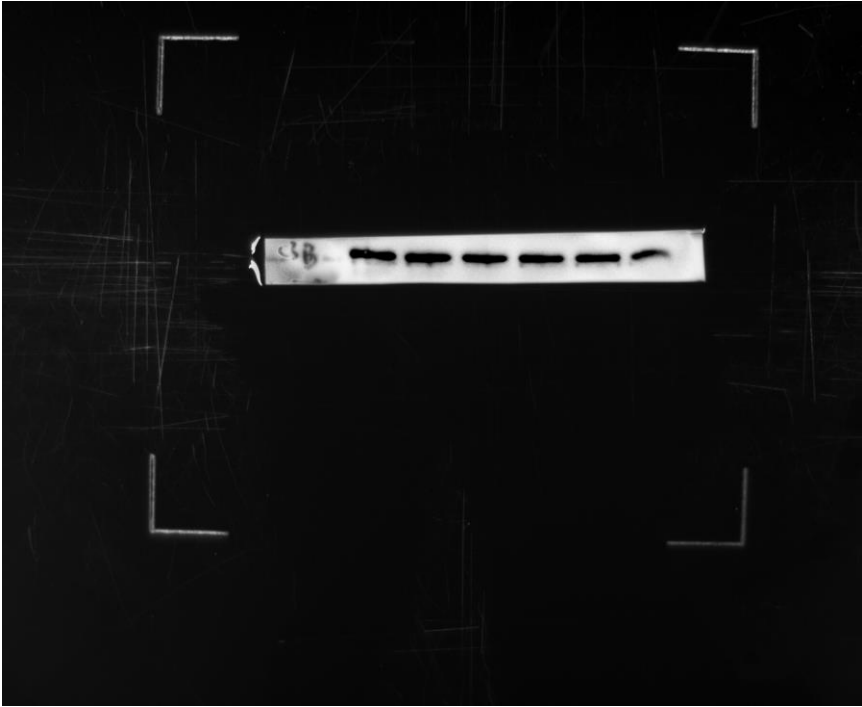

40kDa  
35kDa

CON FS CON FS

36kDa

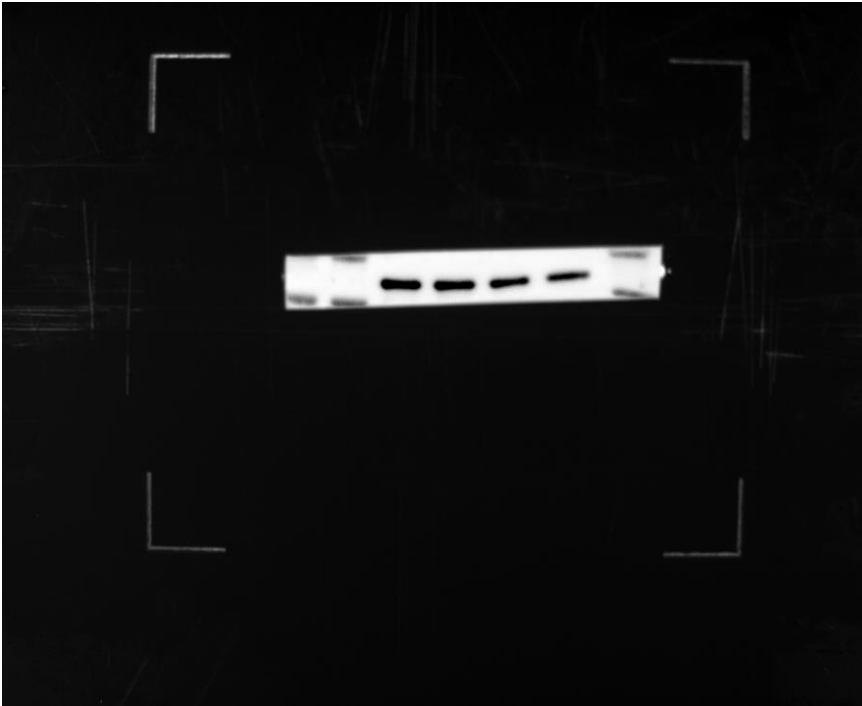

40kDa  
35kDa

CON FS CON FS



36kDa

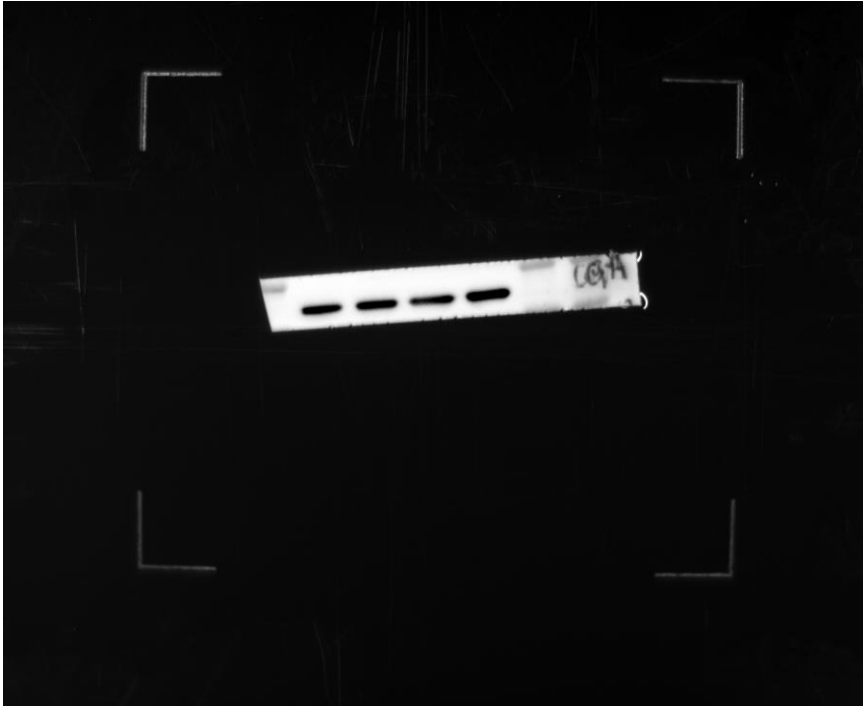

40kDa  
35kDa

WB in figure 4C

Fibronectin

|                  | FS | FS | FS | FS |
|------------------|----|----|----|----|
| TAK715( $\mu$ M) | 0  | 1  | 5  | 10 |

220kD

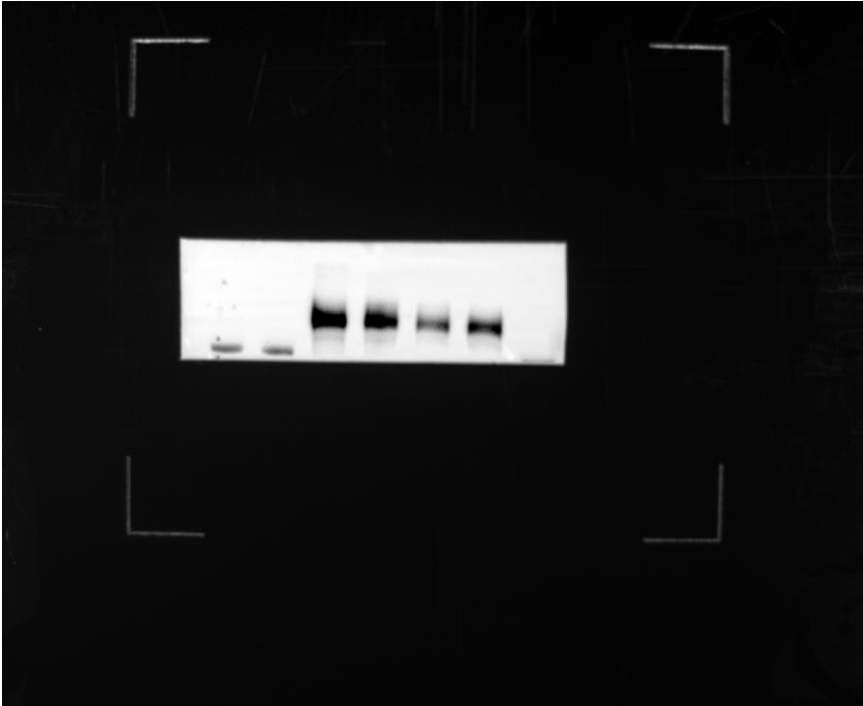

180kDa

|                  | FS | FS | FS | FS |
|------------------|----|----|----|----|
| TAK715( $\mu$ M) | 0  | 1  | 5  | 10 |

220kD

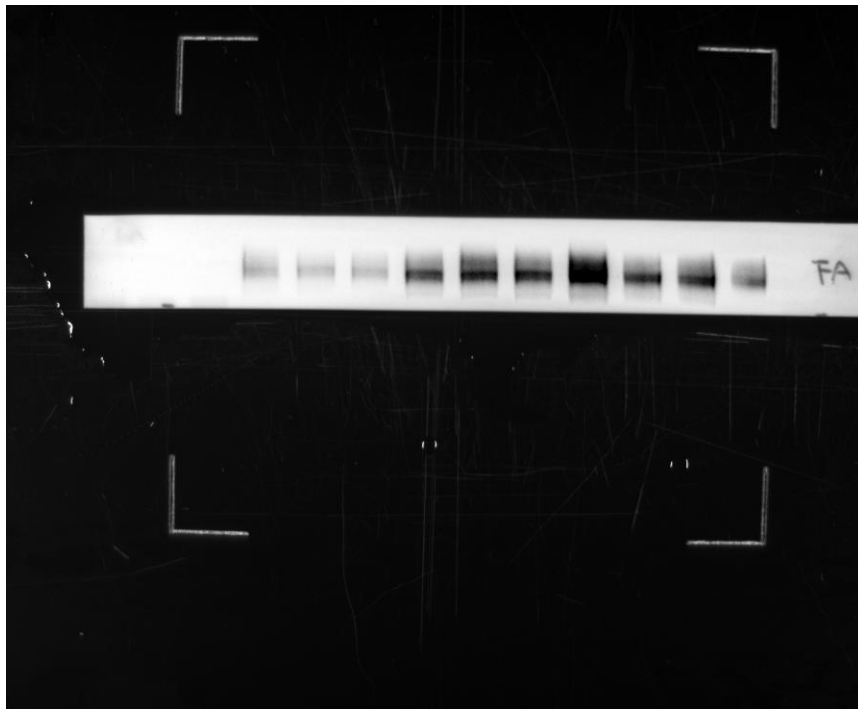

180kDa

FS FS FS FS  
TAK715( $\mu$ M) 0 1 5 10

220kD

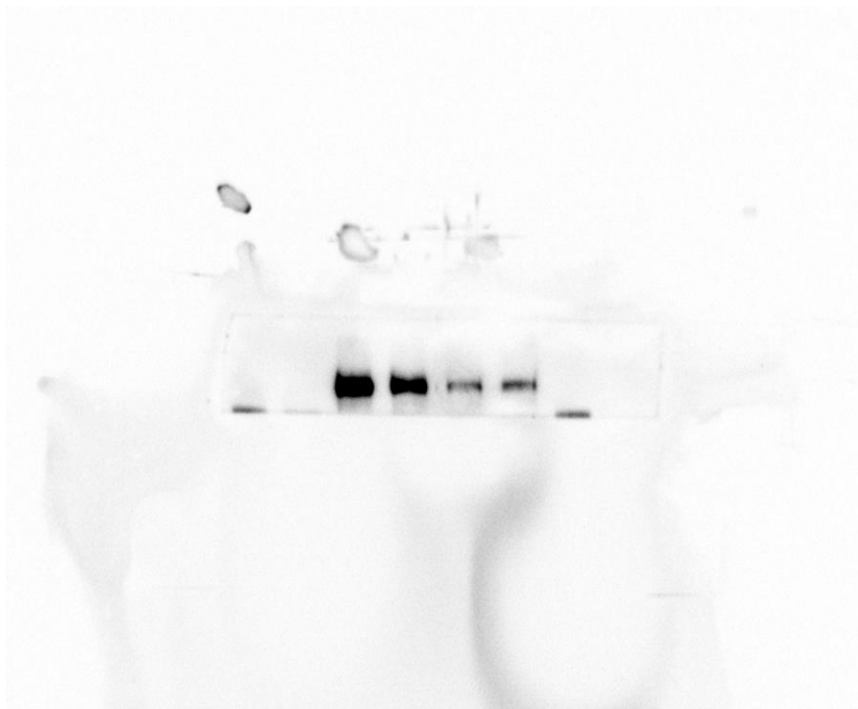

180kDa

Collagen- I

FS FS FS FS

TAK715( $\mu$ M) 0 1 5 10

150kD

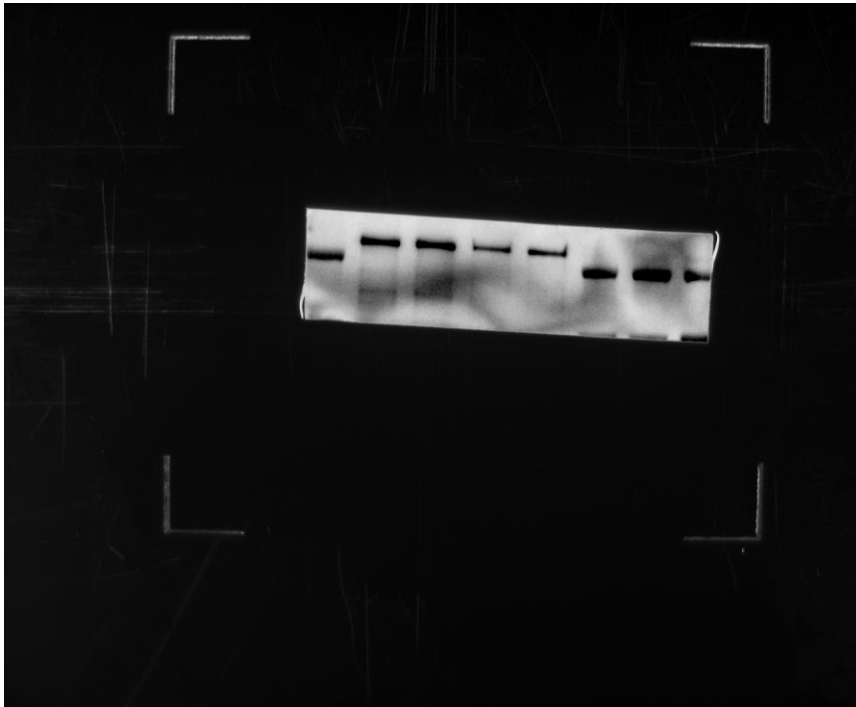

130kDa

FS FS FS FS  
TAK715( $\mu$ M) 0 1 5 10

150kD

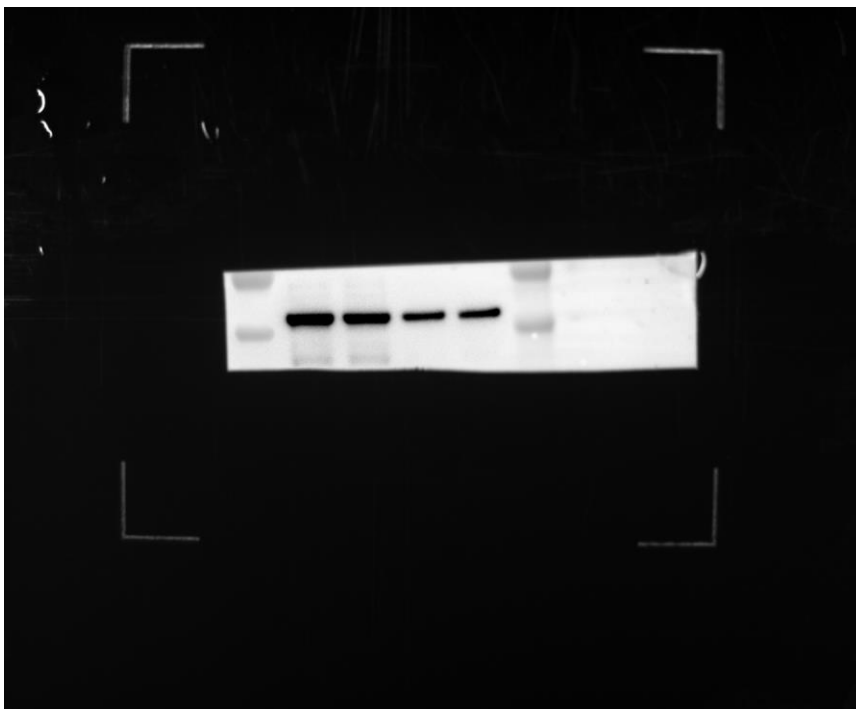

180kDa  
130kDa

FS FS FS FS  
TAK715( $\mu$ M) 0 1 5 10

150kD

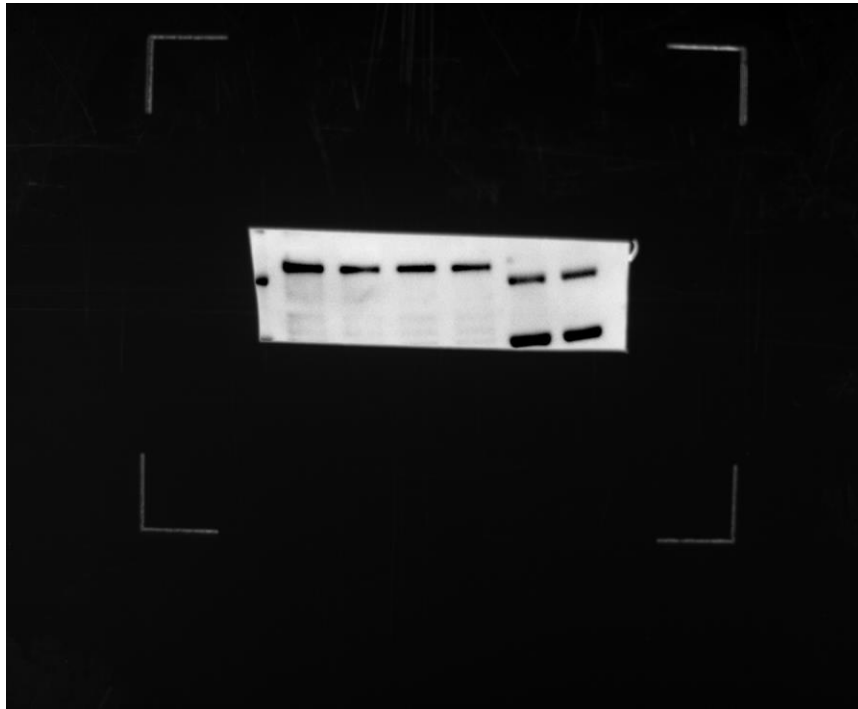

130kDa

**Collagen-III**

|                  |    |    |    |    |
|------------------|----|----|----|----|
|                  | FS | FS | FS | FS |
| TAK715( $\mu$ M) | 0  | 1  | 5  | 10 |

137kDa

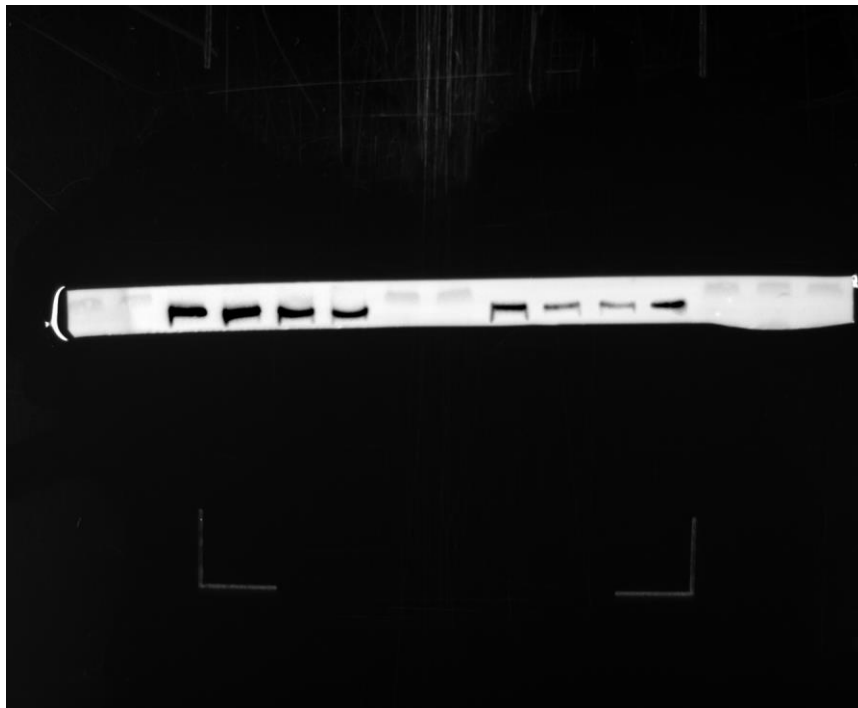

180kDa  
130kDa

FS FS FS FS

TAK715( $\mu$ M) 0 1 5 10

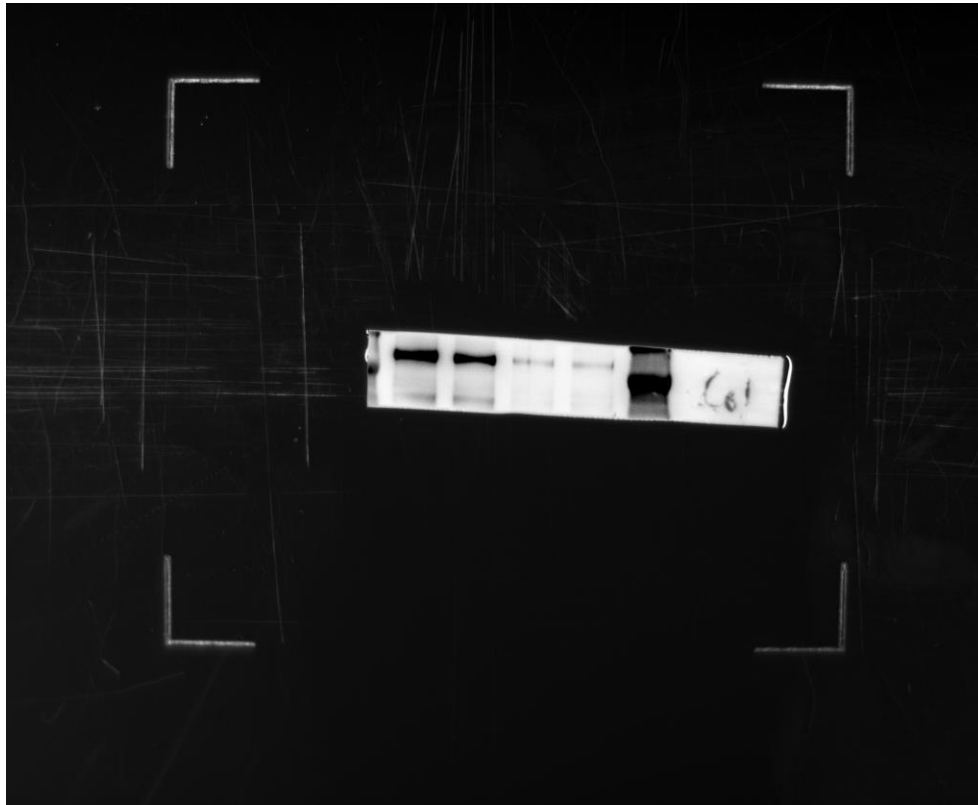

FS FS FS FS  
TAK715( $\mu$ M) 0 1 5 10

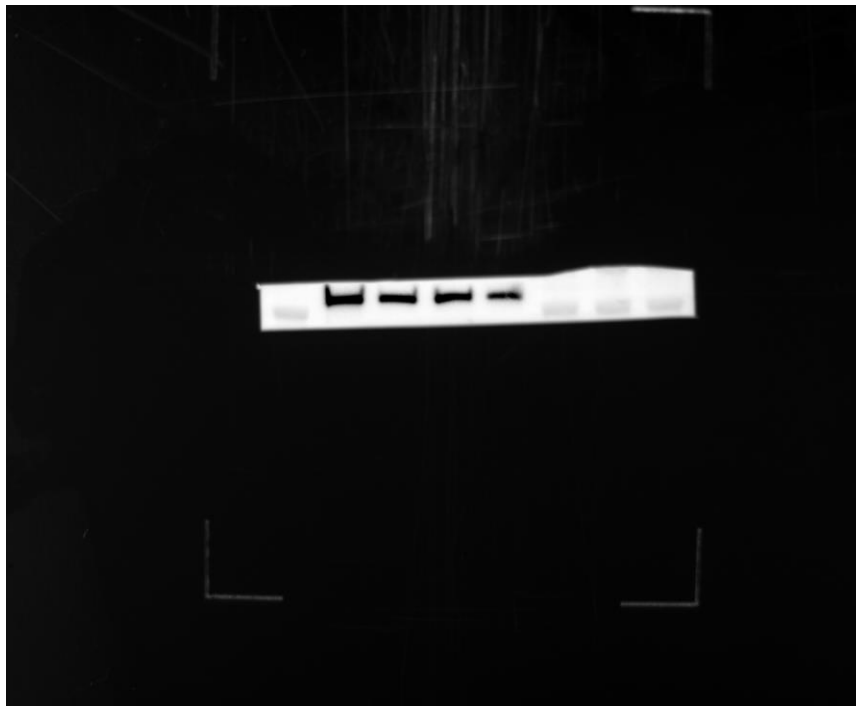

pp-38

FS FS FS FS

TAK715( $\mu$ M) 0 1 5 10

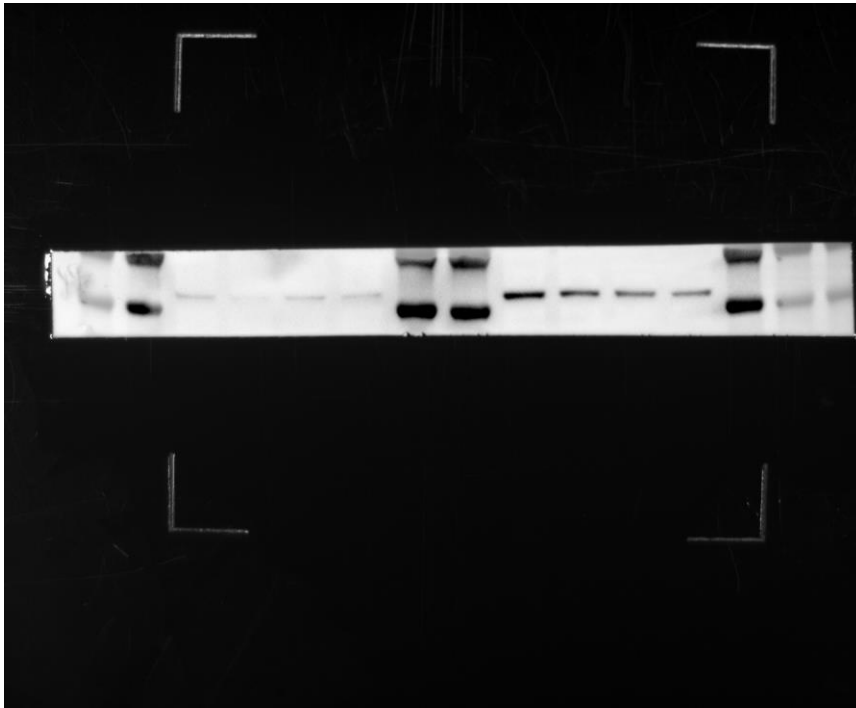

43kDa

55kDa  
40kDa

FS FS FS FS  
TAK715( $\mu$ M) 0 1 5 10

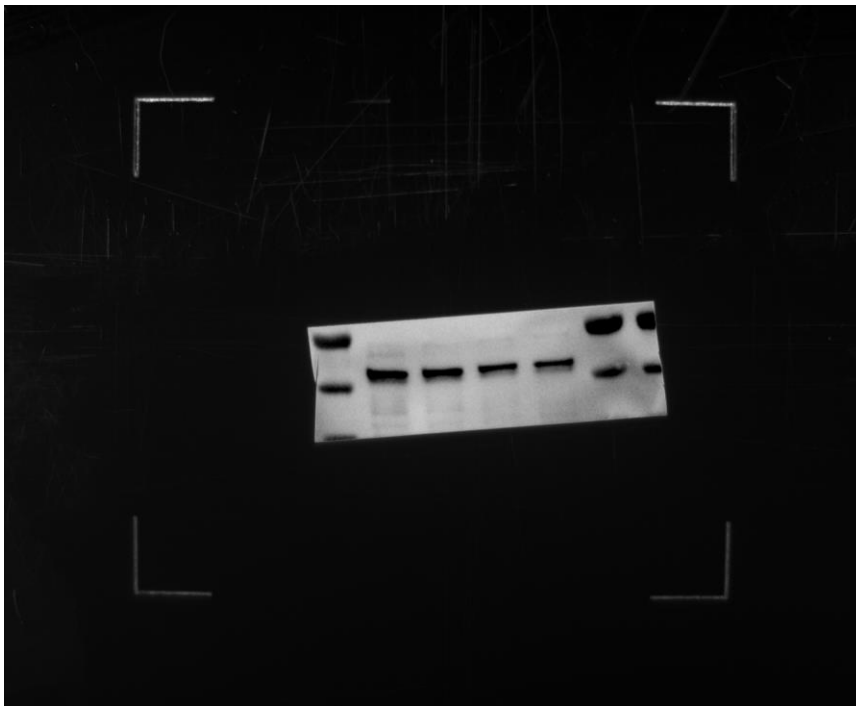

43kDa

55kDa  
40kDa

FS FS FS FS  
TAK715( $\mu$ M) 0 1 5 10

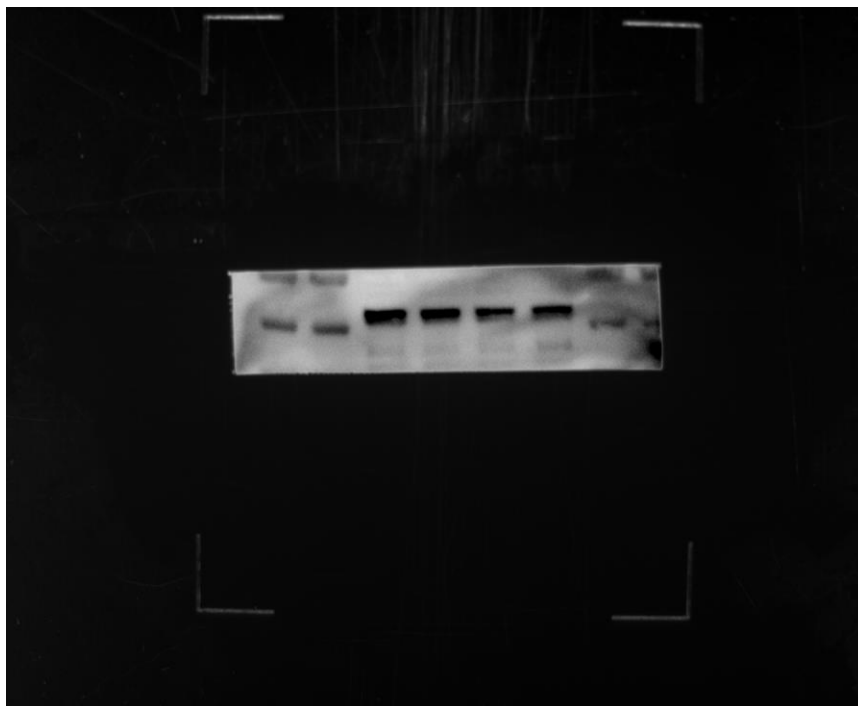

43kDa

55kDa  
40kDa

**P38**

FS FS FS FS  
TAK715( $\mu$ M) 0 1 5 10

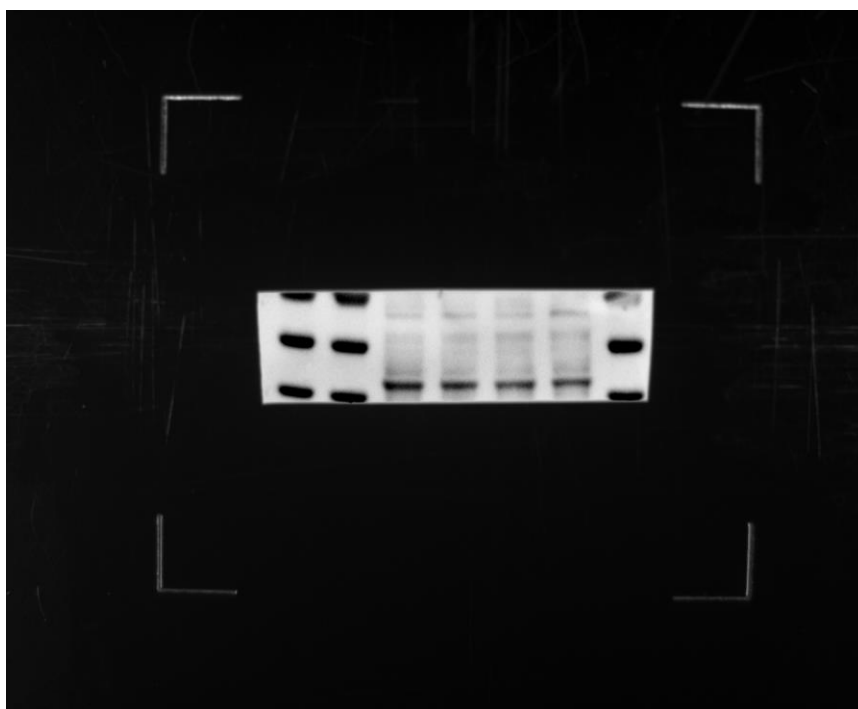

43kDa

55kDa  
40kDa

FS FS FS FS  
TAK715( $\mu$ M) 0 1 5 10

43kDa

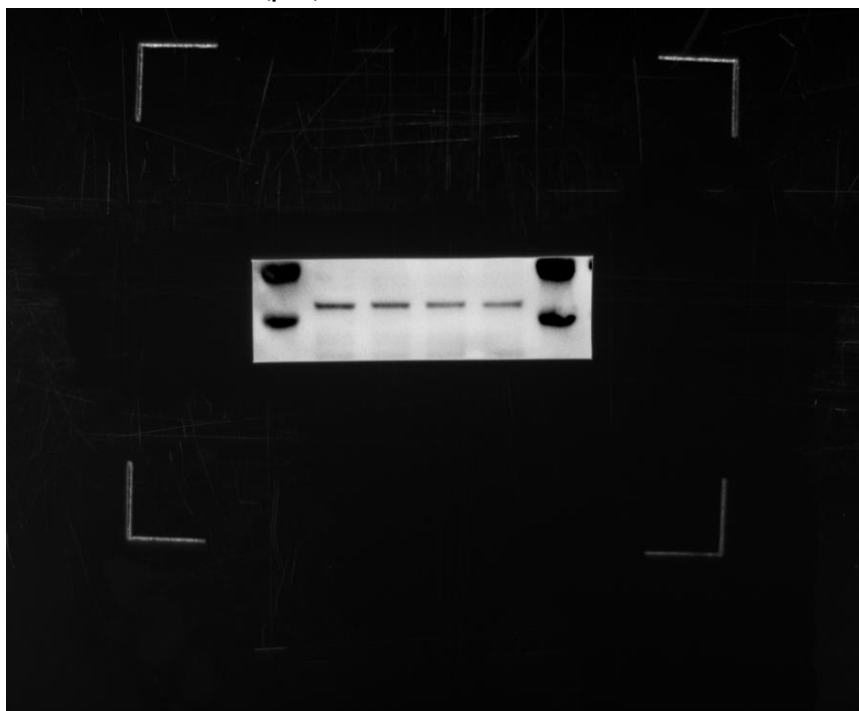

55kDa  
40kDa

FS FS FS FS  
TAK715( $\mu$ M) 0 1 5 10

43kDa

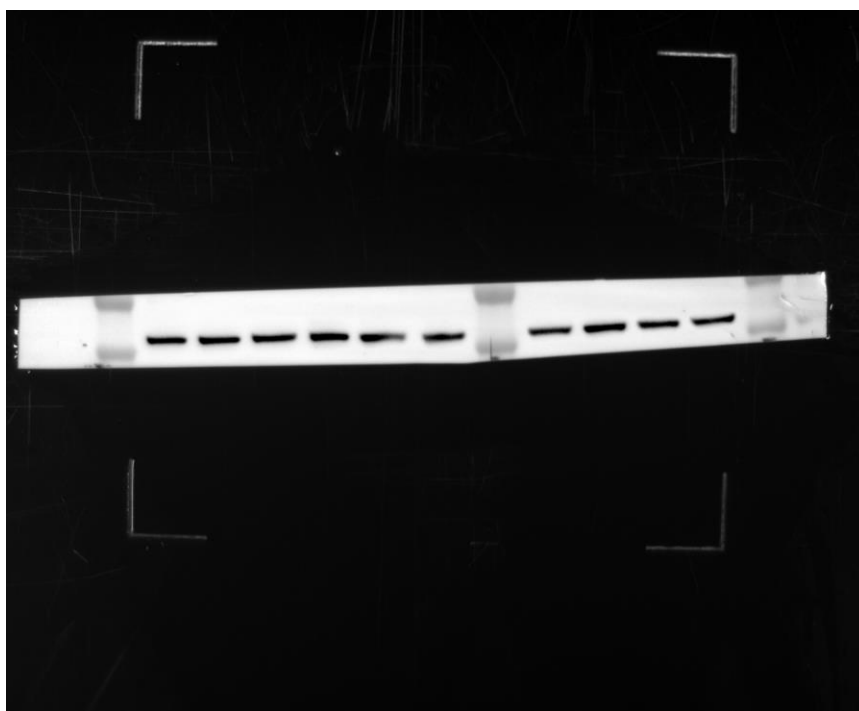

55kDa  
40kDa

GADPH



FS FS FS FS  
TAK715( $\mu$ M) 0 1 5 10

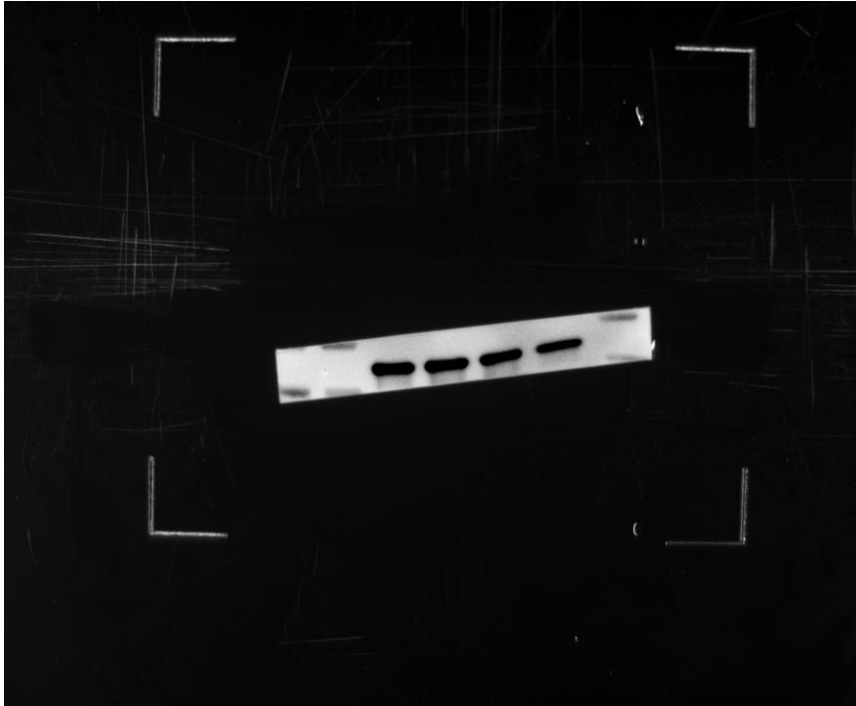

36kDa

40kDa  
35kDa

FS FS FS FS  
TAK715( $\mu$ M) 0 1 5 10

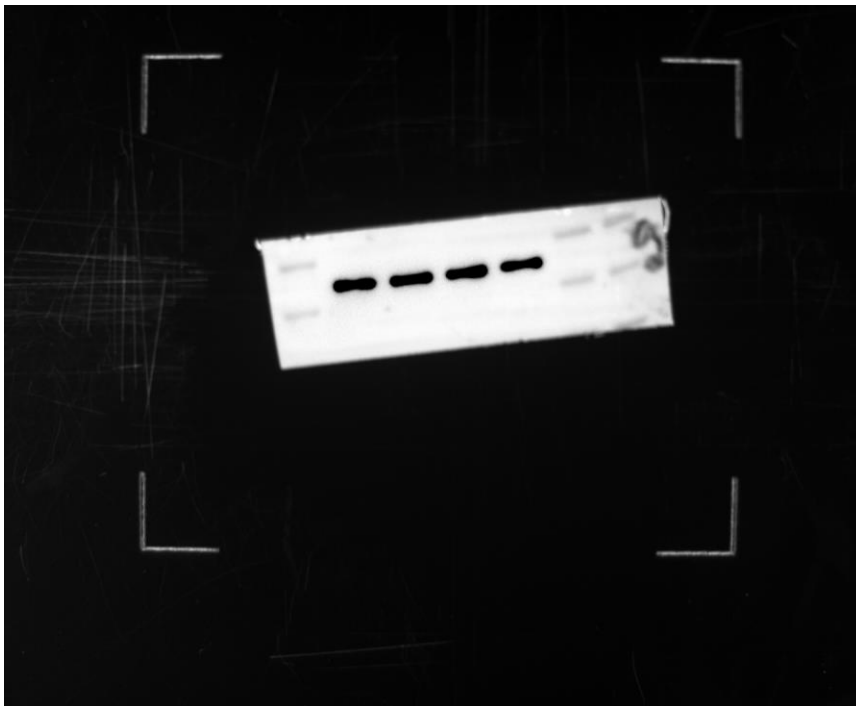

36kDa

40kDa  
35kDa

FS FS FS FS  
TAK715( $\mu$ M) 0 1 5 10

36kDa

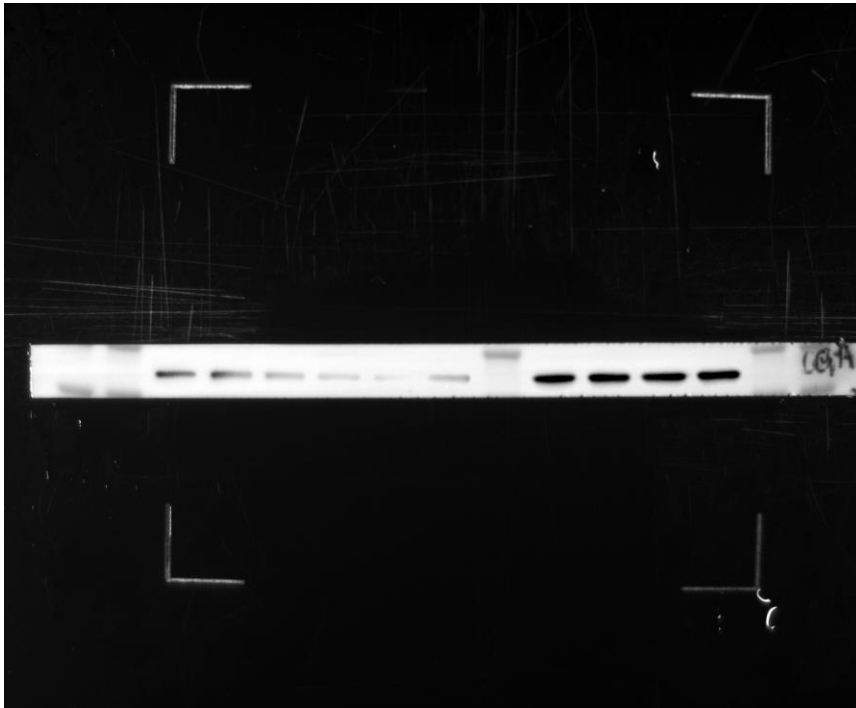

40kDa  
35kDa

WB figure in Figure4 F  
Caspase-3

FS FS FS FS  
TAK715( $\mu$ M) 0 1 5 10

33kDa

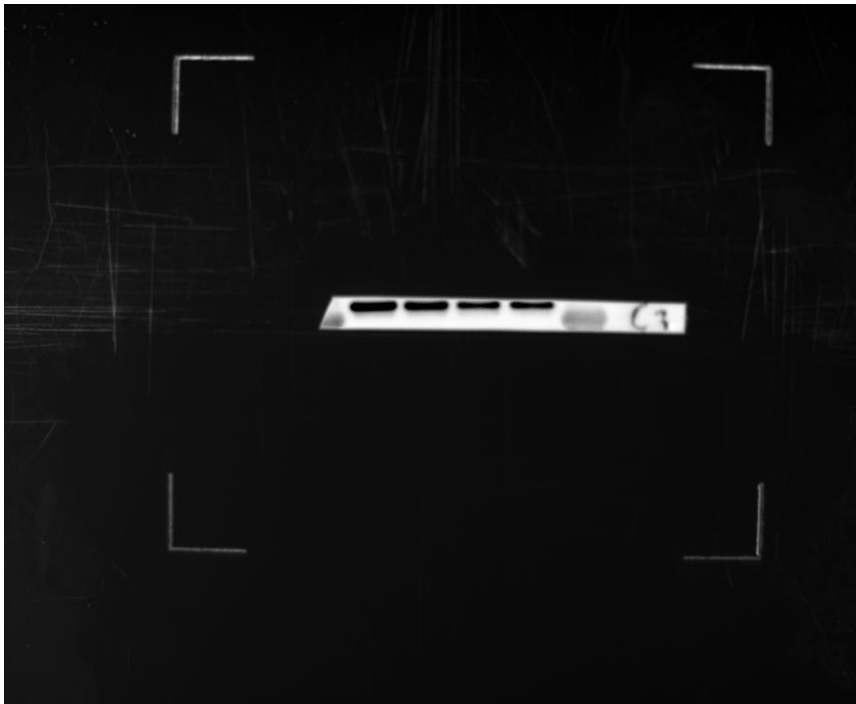

35kDa

FS FS FS FS  
TAK715( $\mu$ M) 0 1 5 10

33kDa

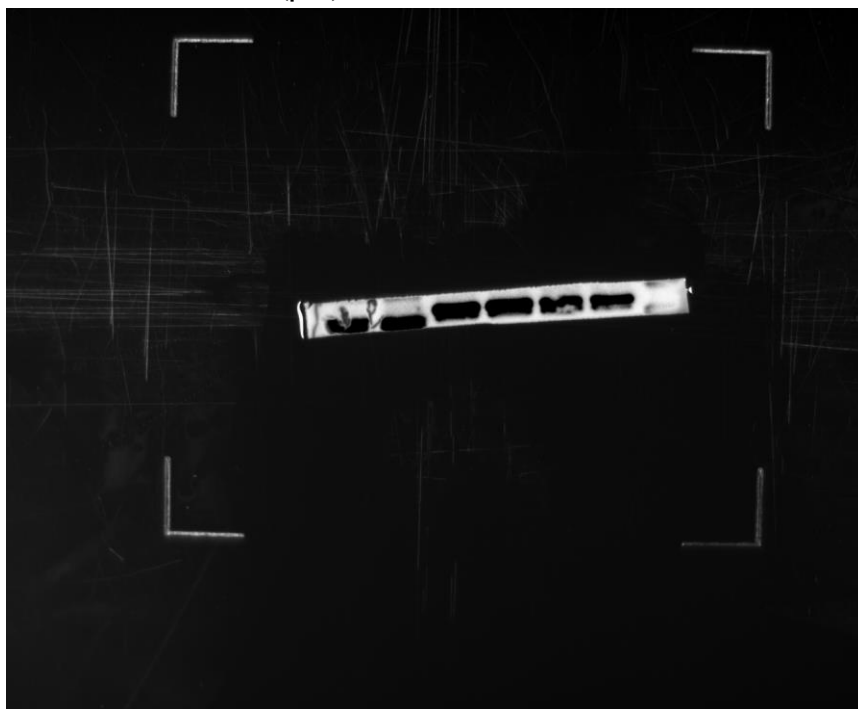

40kDa  
35kDa

FS FS FS FS  
TAK715( $\mu$ M) 0 1 5 10

33kDa

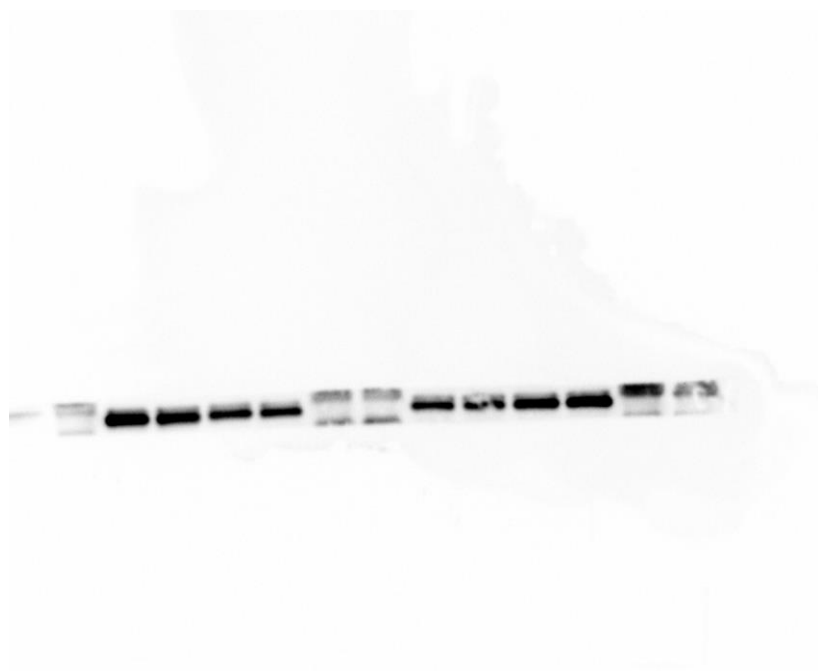

40kDa  
35kDa

**Bax**

FS FS FS FS  
TAK715( $\mu$ M) 0 1 5 10

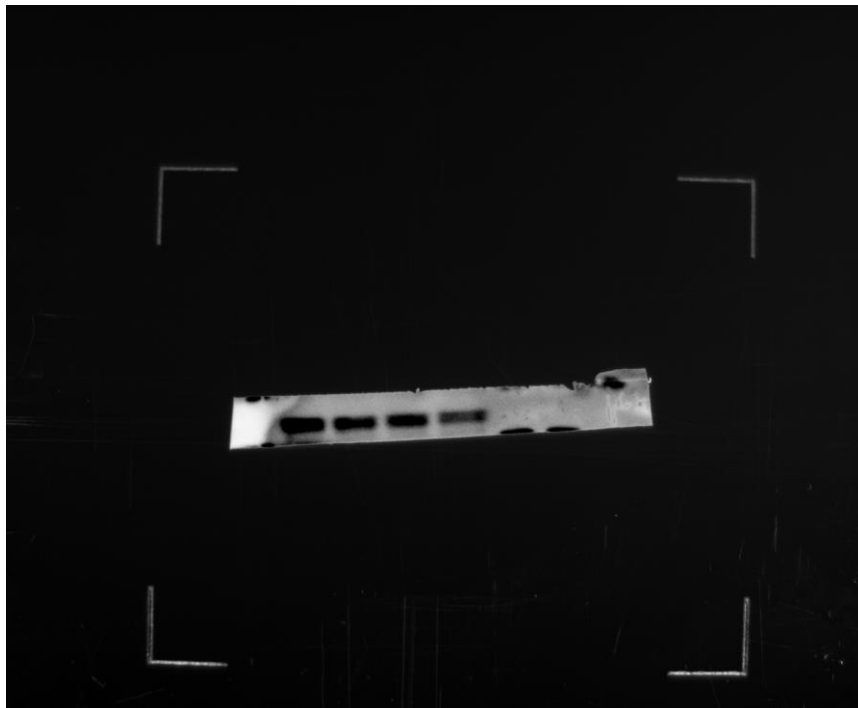

20kDa

25kDa  
15kDa

FS FS FS FS  
TAK715( $\mu$ M) 0 1 5 10

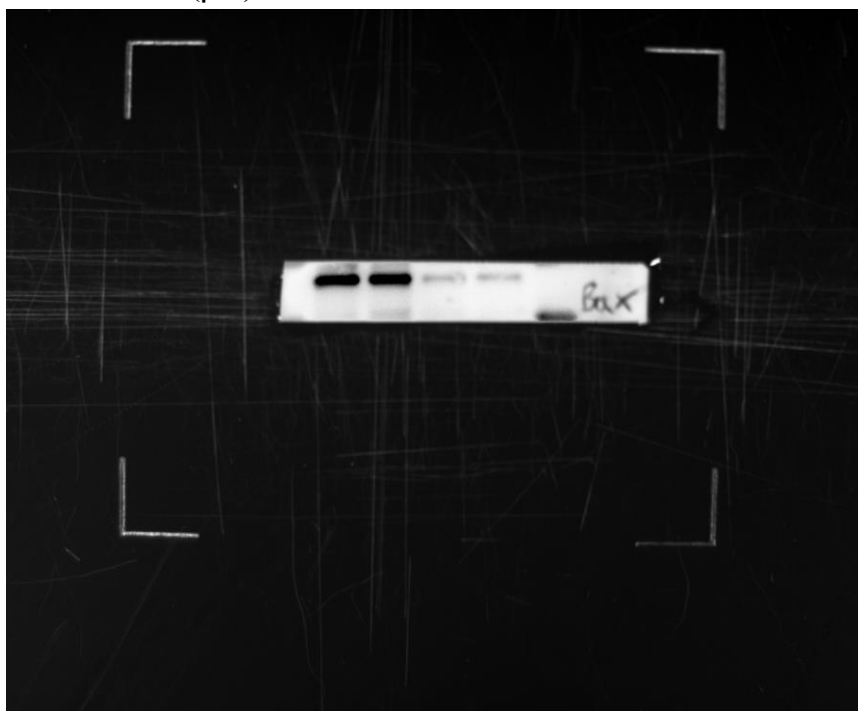

20kDa

25kDa  
15kDa

FS FS FS FS

TAK715( $\mu$ M) 0 1 5 10

20kDa

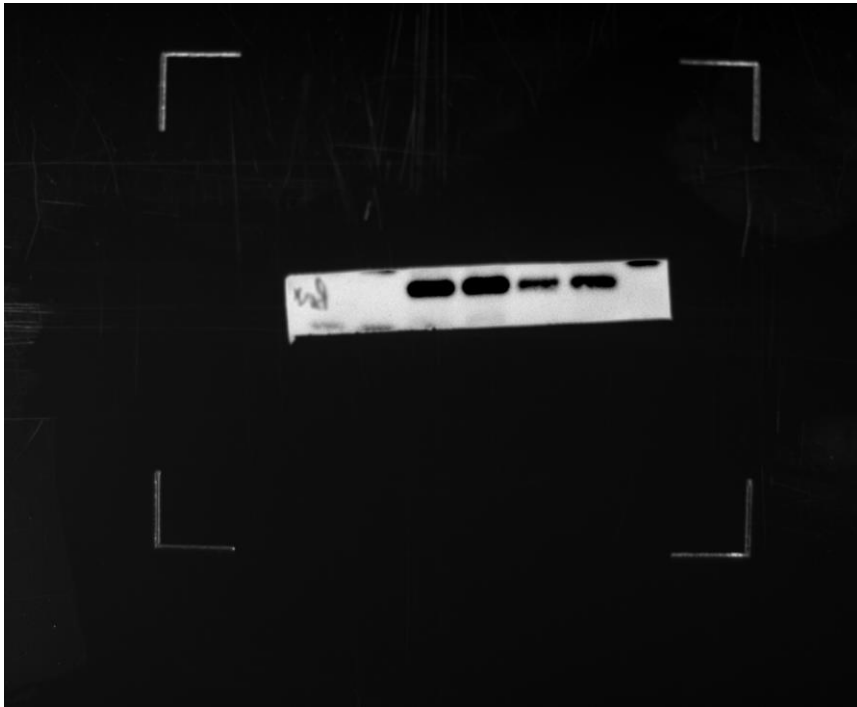

25kDa  
15kDa

GADPH

FS FS FS FS  
TAK715( $\mu$ M) 0 1 5 10

36kDa

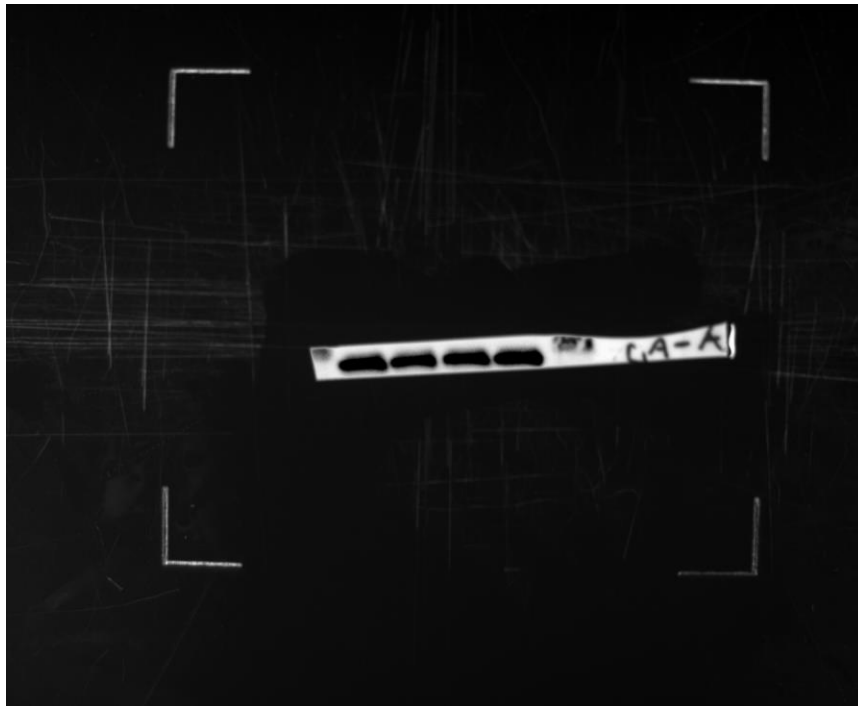

40kDa  
35kDa

FS FS FS FS

TAK715( $\mu$ M) 0 1 5 10

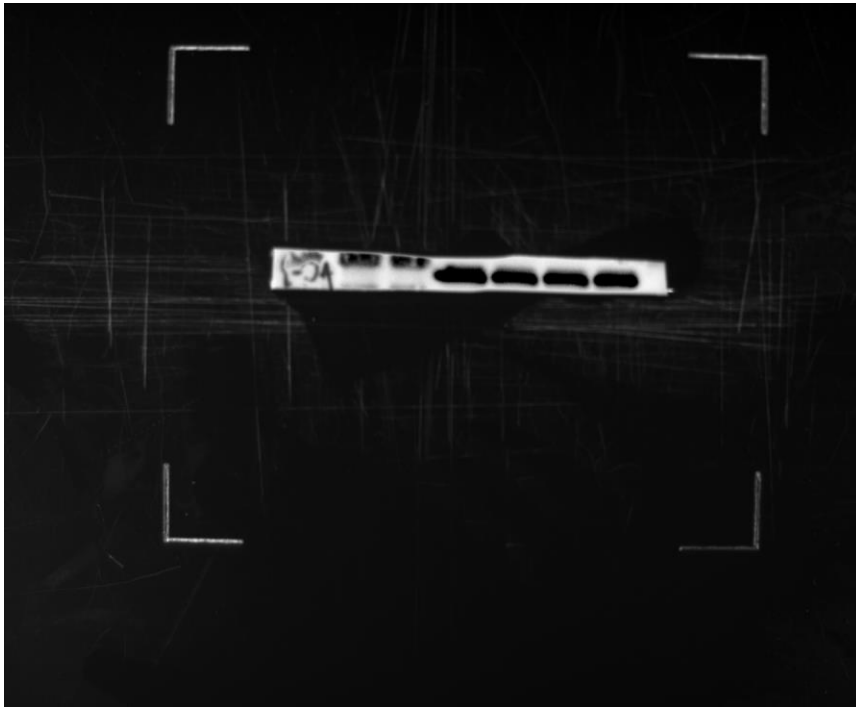

36kDa

40kDa  
35kDa

FS FS FS FS  
TAK715( $\mu$ M) 0 1 5 10

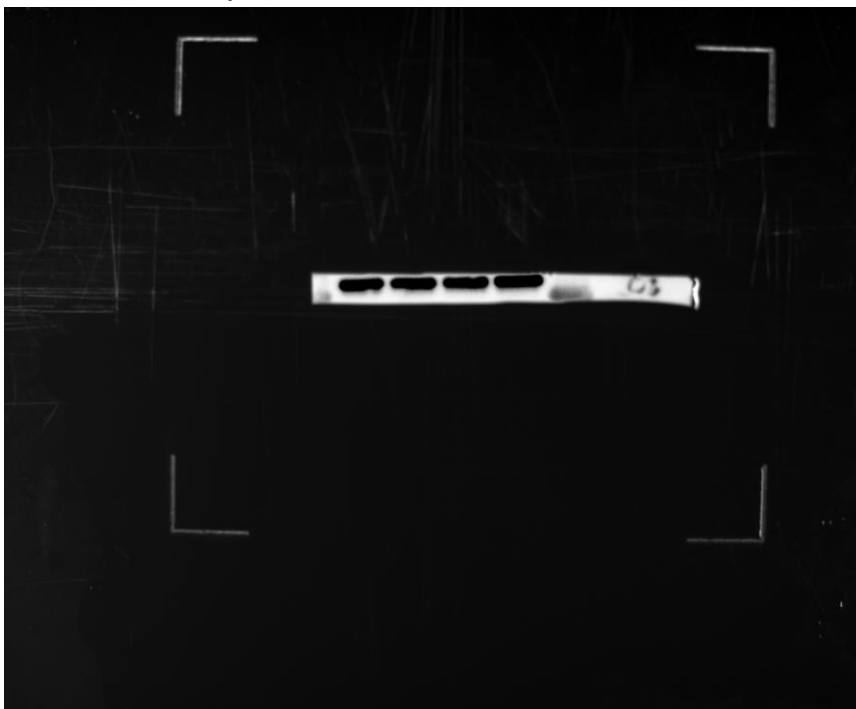

36kDa

40kDa  
35kDa

WB figure in figure4K

**Fibronectin**

|                       |     |     |     |
|-----------------------|-----|-----|-----|
|                       | CON | CON | CON |
| TNF- $\alpha$ (ng/ml) | 0   | 100 | 100 |
| TAK715( $\mu$ M)      | 0   | 0   | 5   |

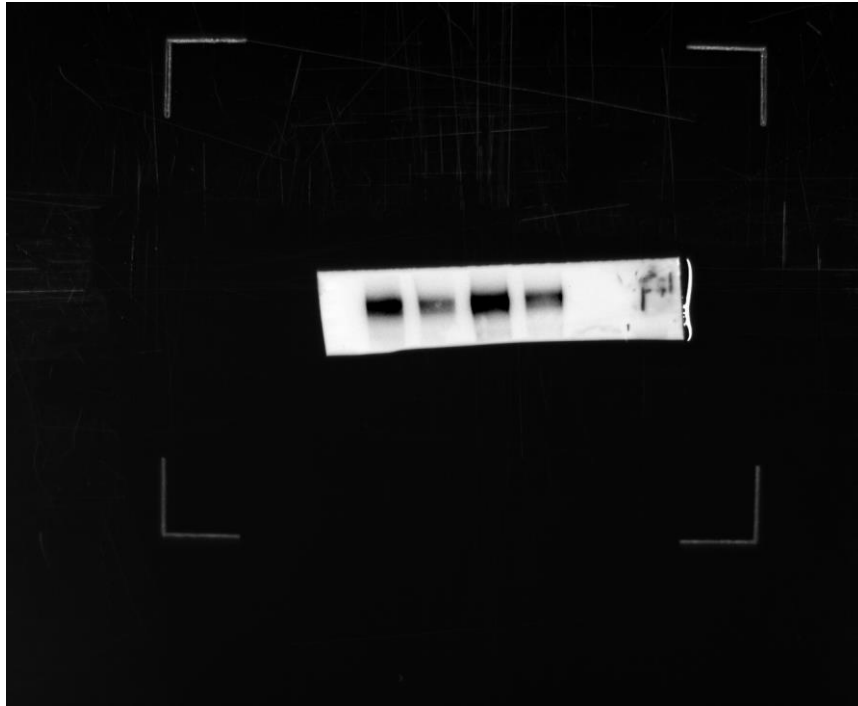

220kDa

180kDa

|                       |     |     |     |
|-----------------------|-----|-----|-----|
|                       | CON | CON | CON |
| TNF- $\alpha$ (ng/ml) | 0   | 100 | 100 |
| TAK715( $\mu$ M)      | 0   | 0   | 5   |

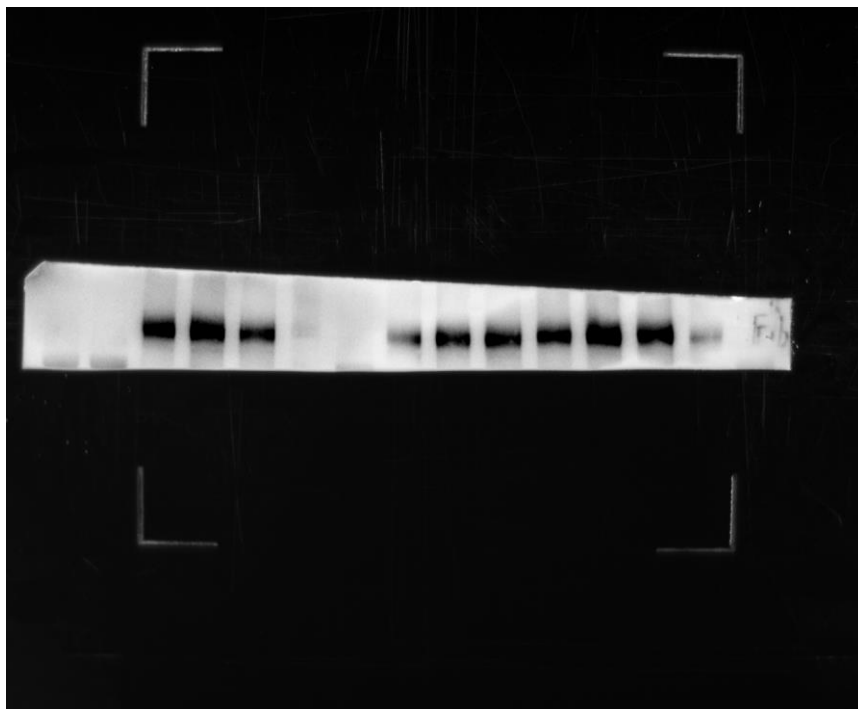

220kDa

180kDa

CON CON CON  
TNF- $\alpha$ (ng/ml) 0 100 100  
TAK715( $\mu$ M) 0 0 5

220kDa

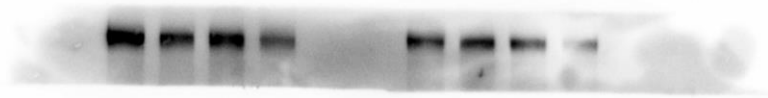

180kDa

**Collagen-I**

CON CON CON  
TNF- $\alpha$ (ng/ml) 0 100 100  
TAK715( $\mu$ M) 0 0 5



150kDa

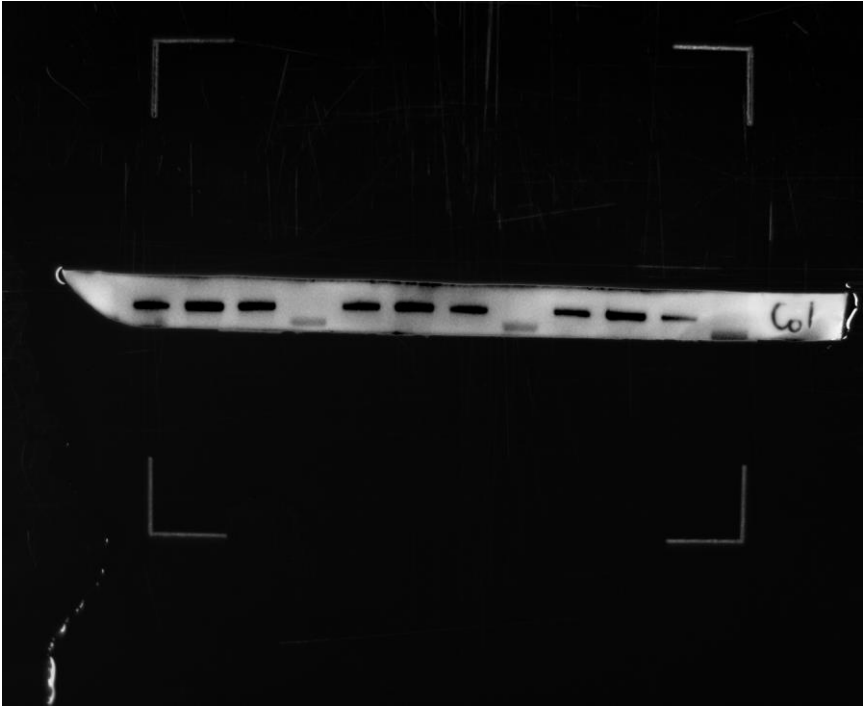

180kDa  
130kDa

CON CON CON

TNF- $\alpha$ (ng/ml) 0 100 100

TAK715( $\mu$ M) 0 0 5

150kDa

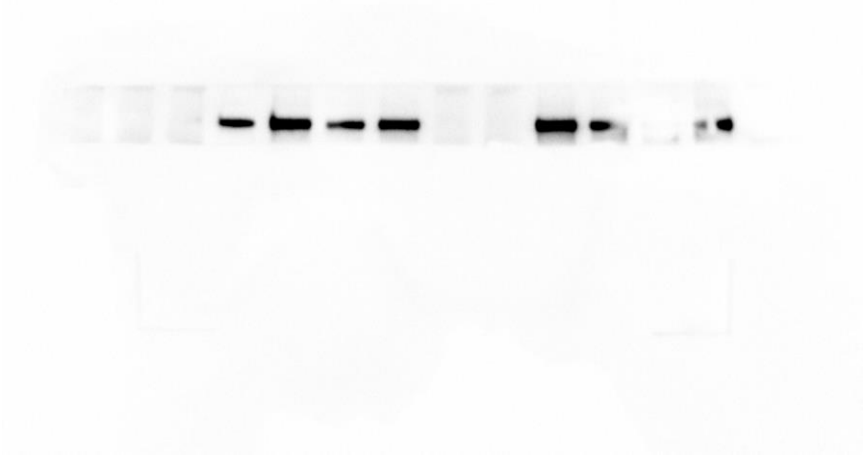

180kDa  
130kDa

CON CON CON

TNF- $\alpha$ (ng/ml) 0 100 100

TAK715( $\mu$ M) 0 0 5

150kDa

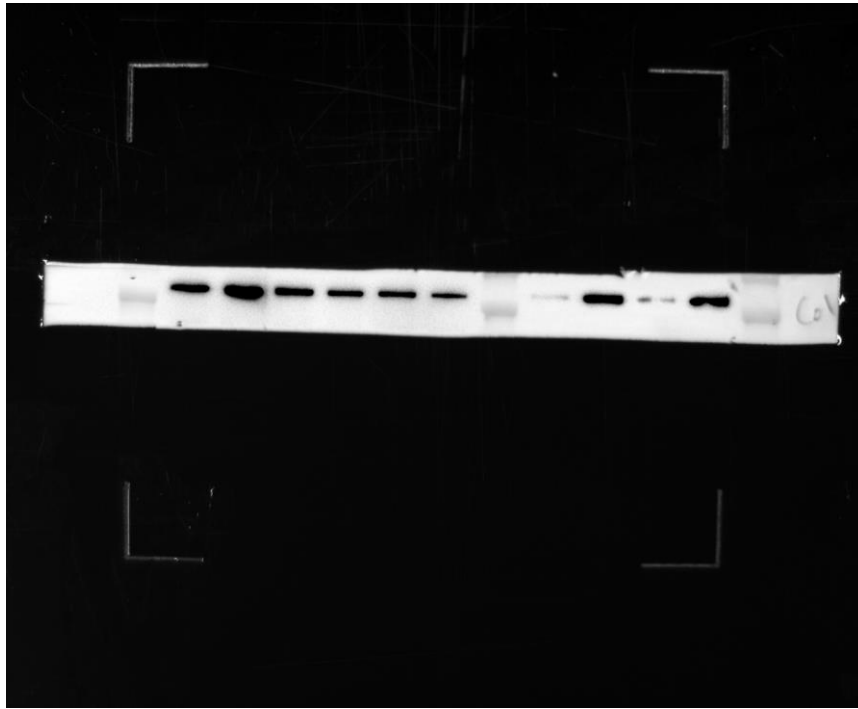

180kDa  
130kDa

**Collagen-III**

|                       |     |     |     |  |
|-----------------------|-----|-----|-----|--|
|                       | CON | CON | CON |  |
| TNF- $\alpha$ (ng/ml) | 0   | 100 | 100 |  |
| TAK715( $\mu$ M)      | 0   | 0   | 5   |  |

137kDa

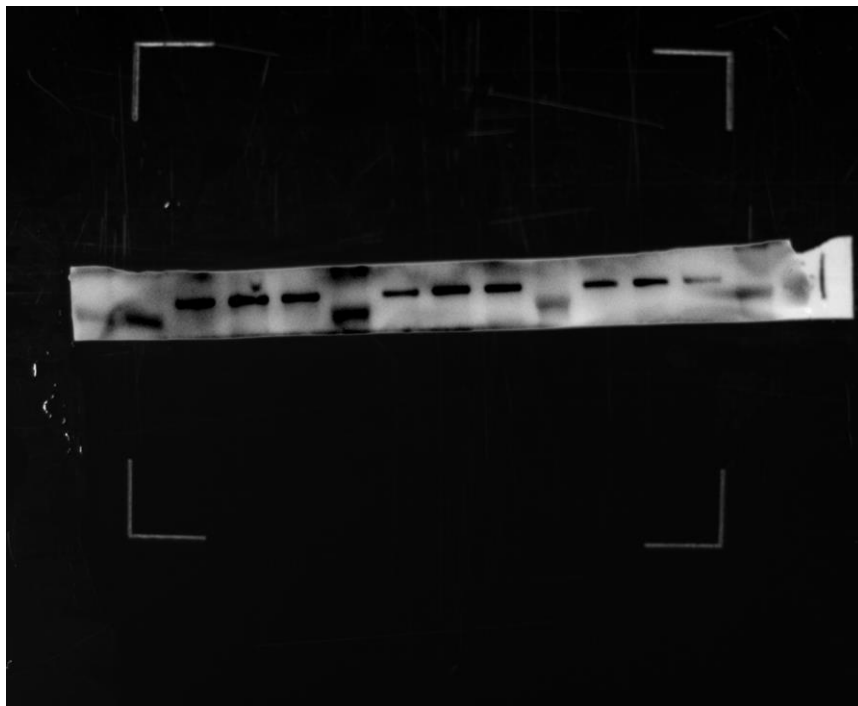

180kDa  
130kDa

|                       |     |     |     |     |     |     |
|-----------------------|-----|-----|-----|-----|-----|-----|
|                       | CON | CON | CON | CON | CON | CON |
| TNF- $\alpha$ (ng/ml) | 0   | 100 | 100 | 0   | 100 | 100 |

|                       |   |     |     |   |     |     |
|-----------------------|---|-----|-----|---|-----|-----|
| TNF- $\alpha$ (ng/ml) | 0 | 100 | 100 | 0 | 100 | 100 |
| TAK715( $\mu$ M)      | 0 | 0   | 5   | 0 | 0   | 5   |

137kDa

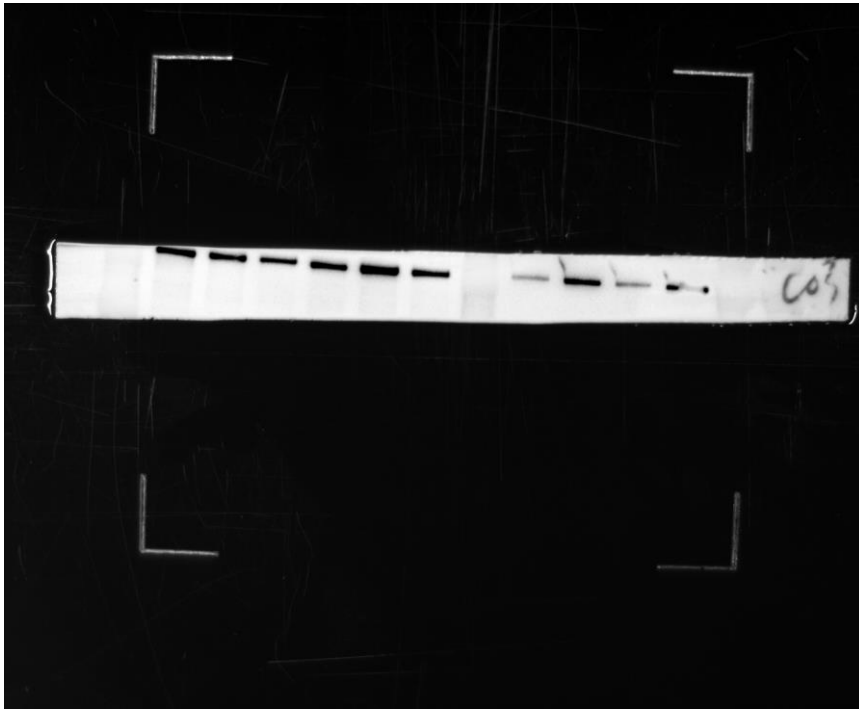

180kDa  
130kDa

p-p38

|                       |     |     |     |
|-----------------------|-----|-----|-----|
|                       | CON | CON | CON |
| TNF- $\alpha$ (ng/ml) | 0   | 100 | 100 |
| TAK715( $\mu$ M)      | 0   | 0   | 5   |

43kDa

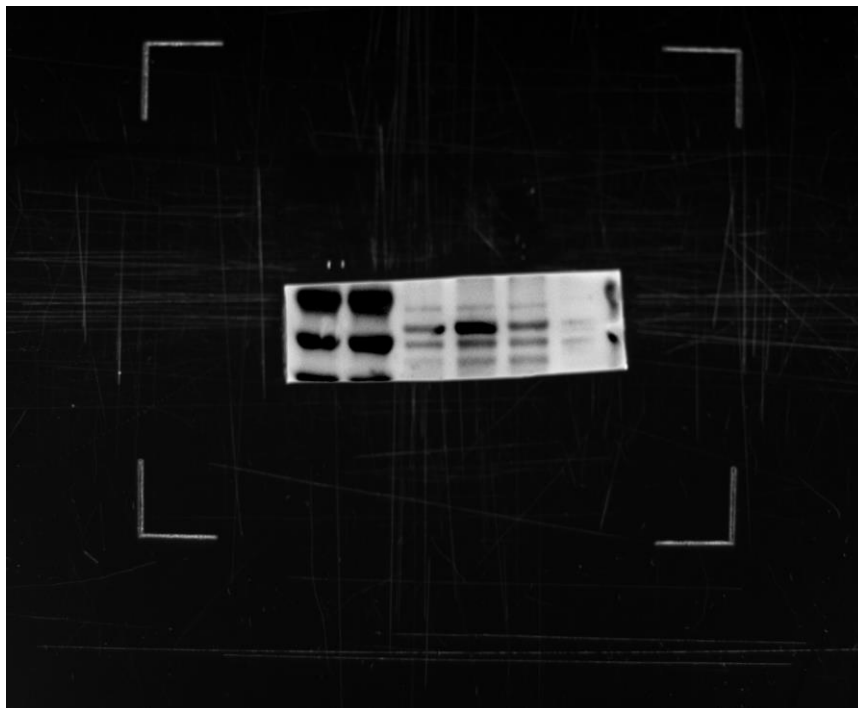

55kDa  
40kDa

|                       |     |     |     |
|-----------------------|-----|-----|-----|
|                       | CON | CON | CON |
| TNF- $\alpha$ (ng/ml) | 0   | 100 | 100 |

TAK715( $\mu$ M) 0 0 5

43kDa

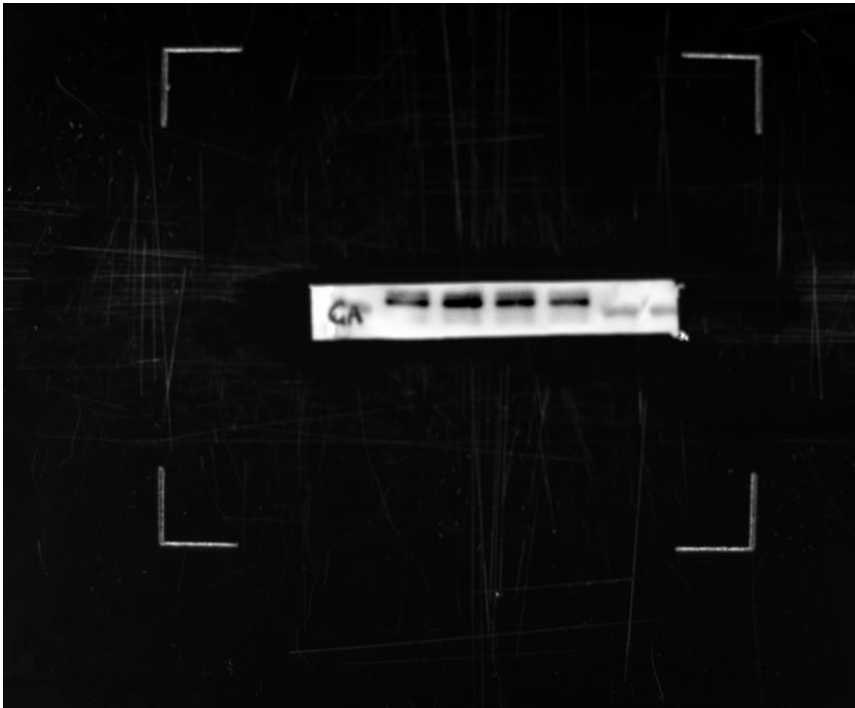

40kDa

CON CON CON  
TNF- $\alpha$ (ng/ml) 0 100 100  
TAK715( $\mu$ M) 0 0 5

43kDa

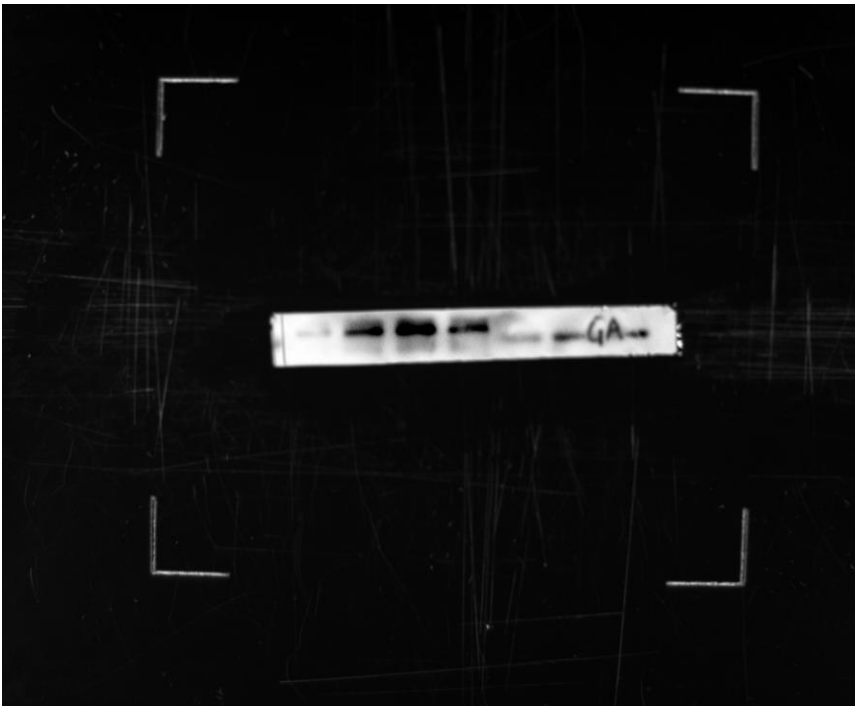

40kDa

p-38

CON CON CON

TNF- $\alpha$ (ng/ml) 0 100 100  
TAK715( $\mu$ M) 0 0 5

43kDa

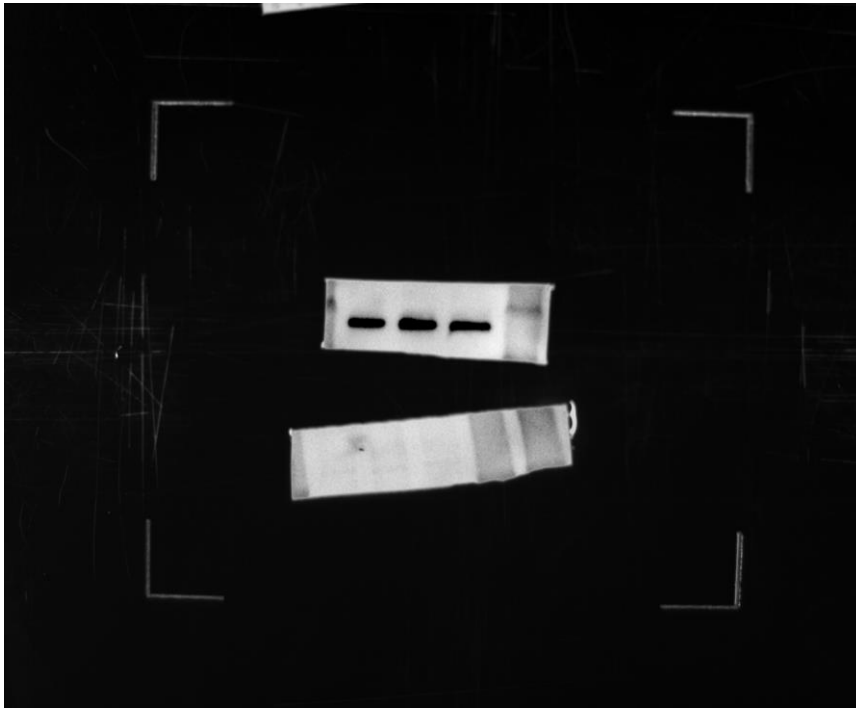

55kDa  
40kDa

CON CON CON  
TNF- $\alpha$ (ng/ml) 0 100 100  
TAK715( $\mu$ M) 0 0 5

43kDa

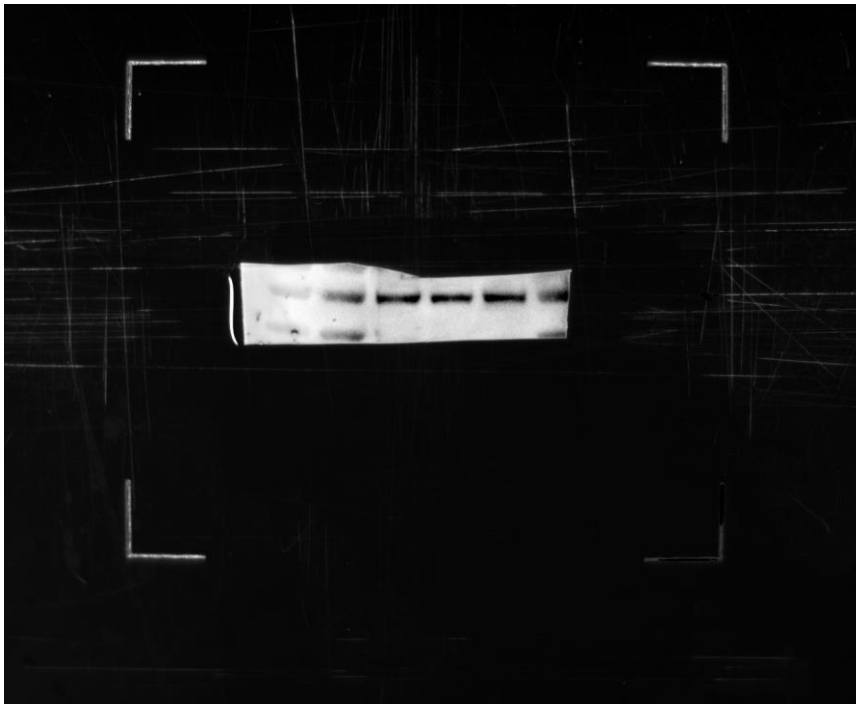

55kDa  
40kDa

CON CON CON

TNF- $\alpha$ (ng/ml) 0 100 100  
TAK715( $\mu$ M) 0 0 5

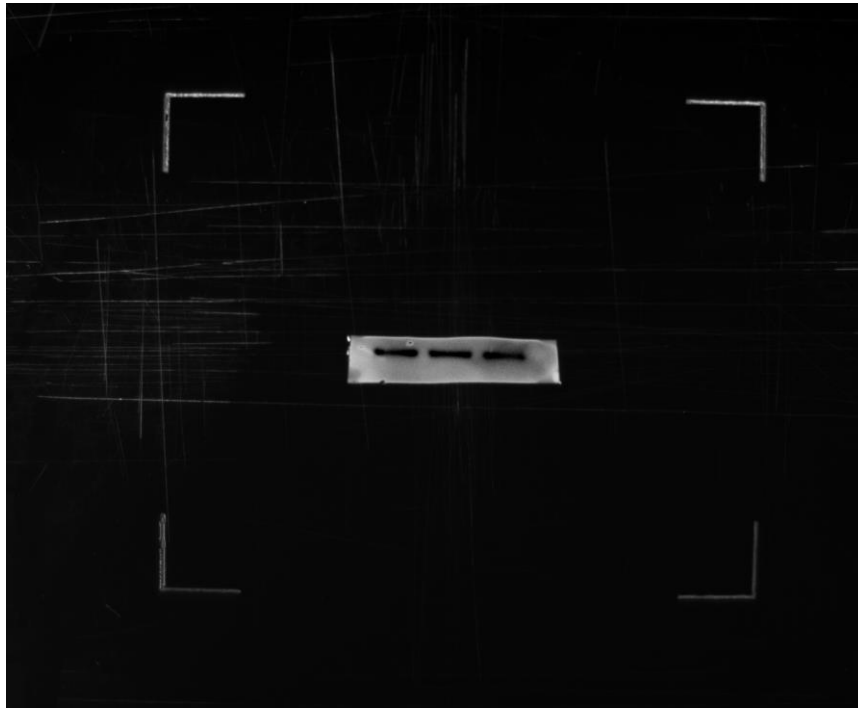

Caspase-3

CON CON CON  
TNF- $\alpha$ (ng/ml) 0 100 100  
TAK715( $\mu$ M) 0 0 5

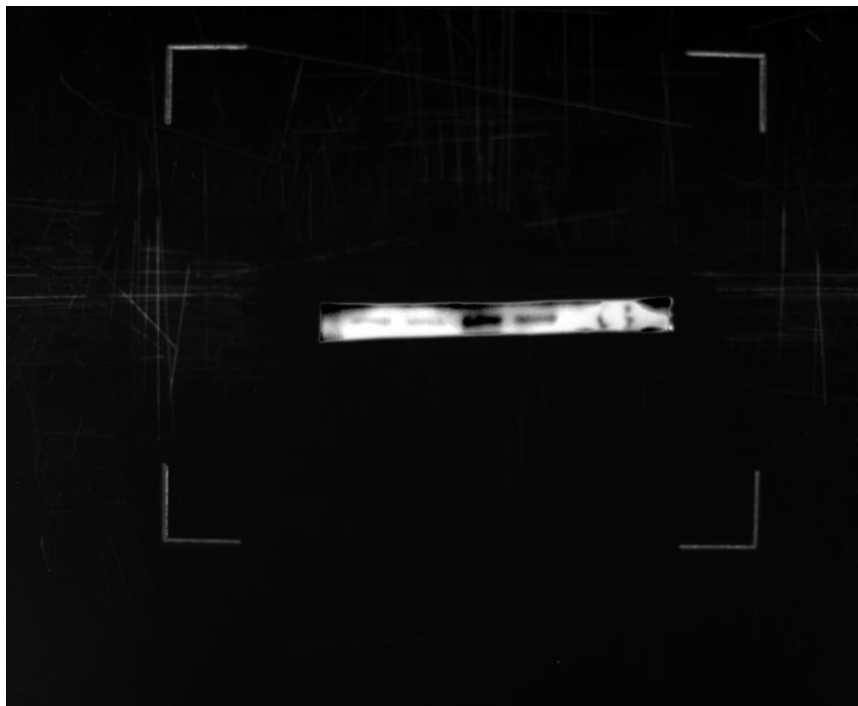

CON CON CON

TNF- $\alpha$ (ng/ml) 0 100 100  
TAK715( $\mu$ M) 0 0 5

33kDa

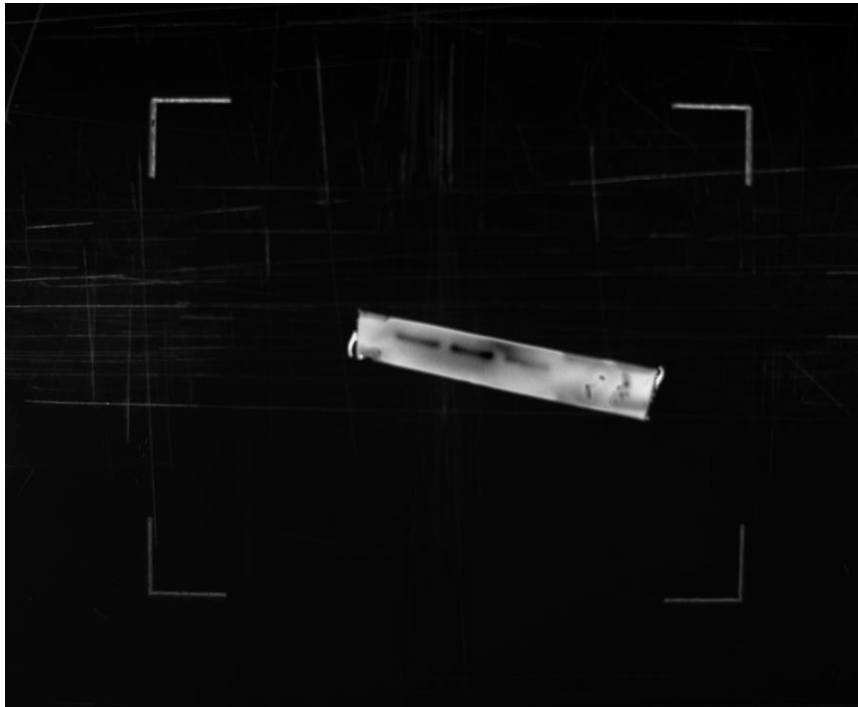

40kDa  
35kDa

CON CON CON  
TNF- $\alpha$ (ng/ml) 0 100 100  
TAK715( $\mu$ M) 0 0 5

33kDa

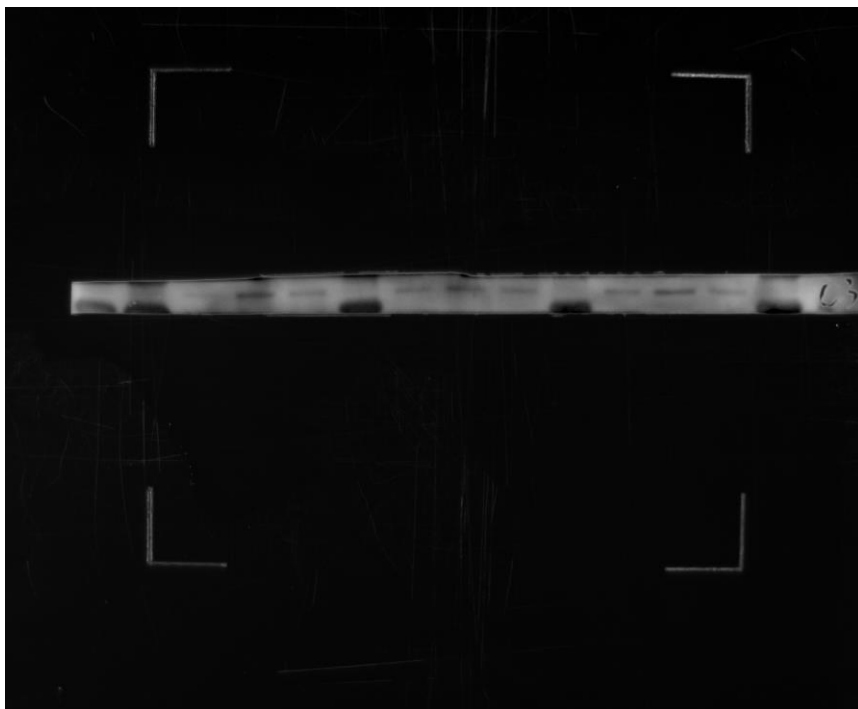

40kDa  
35kDa

Bax

CON CON CON  
TNF- $\alpha$ (ng/ml) 0 100 100  
TAK715( $\mu$ M) 0 0 5

20kDa

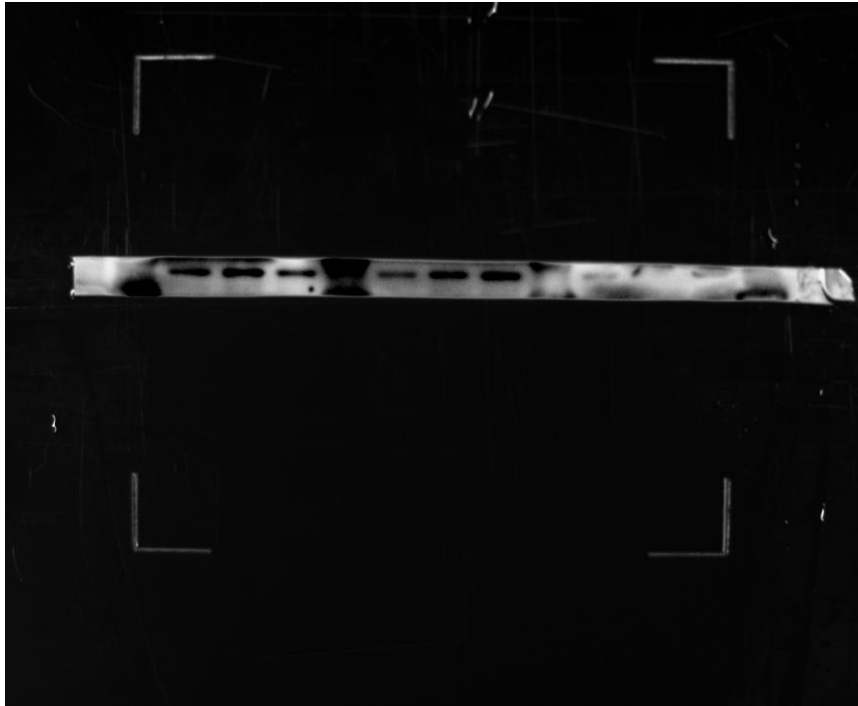

25kDa  
15kDa

CON CON CON  
TNF- $\alpha$ (ng/ml) 0 100 100  
TAK715( $\mu$ M) 0 0 5

20kDa

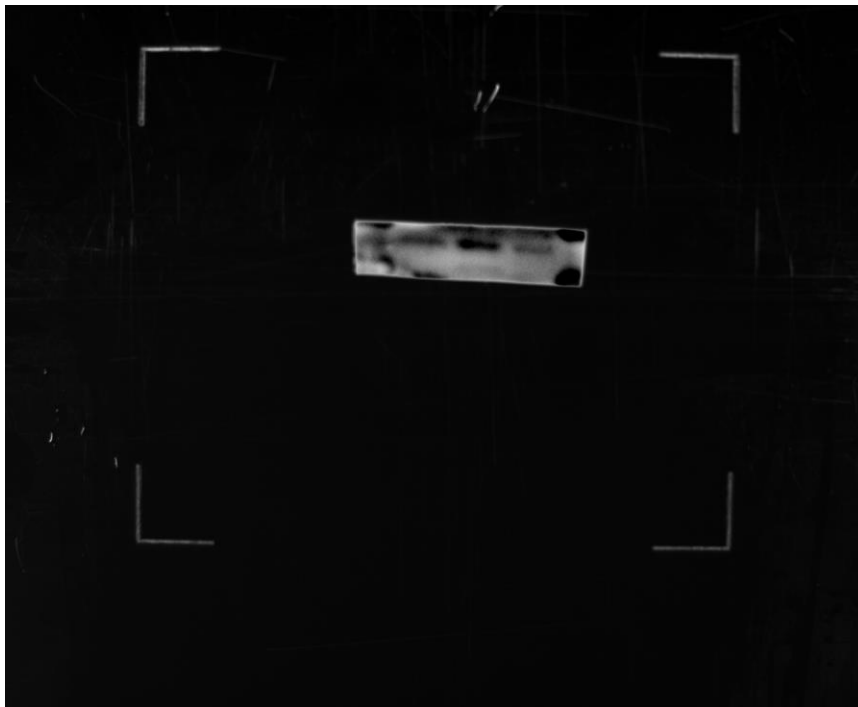

25kDa  
15kDa



CON CON CON  
TNF- $\alpha$ (ng/ml) 0 100 100  
TAK715( $\mu$ M) 0 0 5

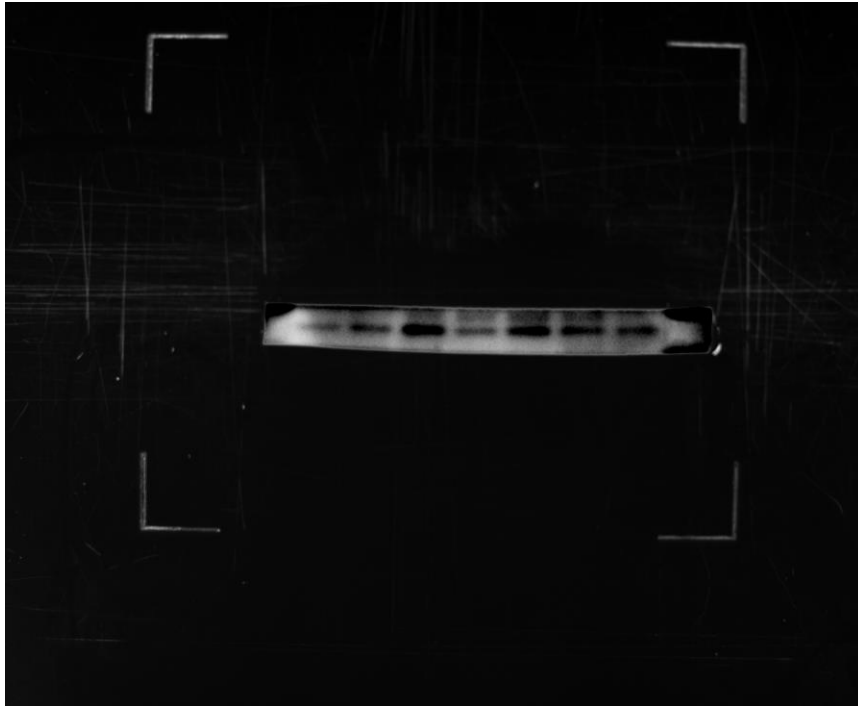

20kDa

25kDa  
15kDa

GADPH

CON CON CON  
TNF- $\alpha$ (ng/ml) 0 100 100  
TAK715( $\mu$ M) 0 0 5

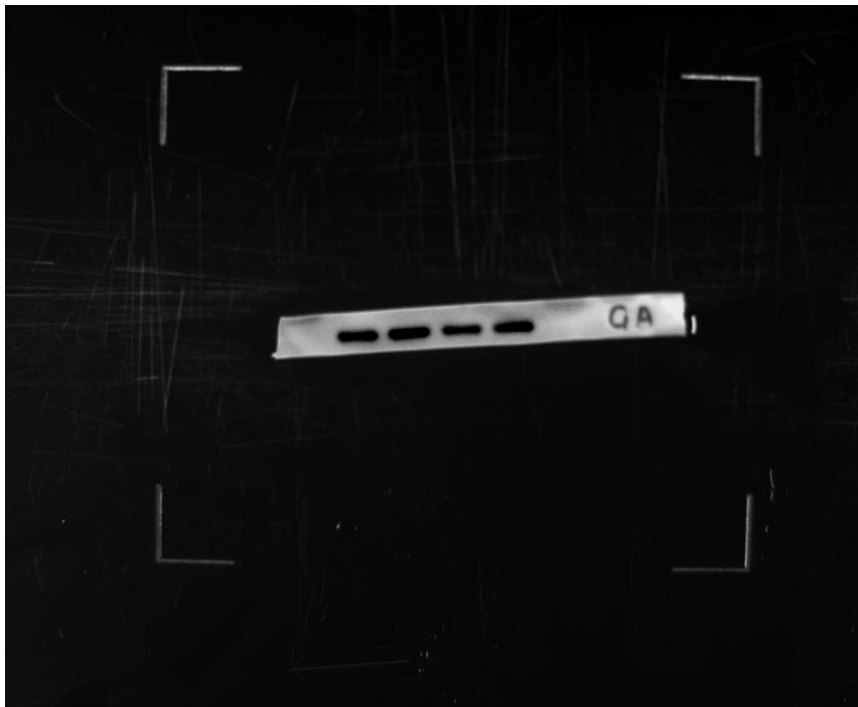

36kDa

40kDa  
35kDa

CON CON CON

TNF- $\alpha$ (ng/ml) 0 100 100  
TAK715( $\mu$ M) 0 0 5

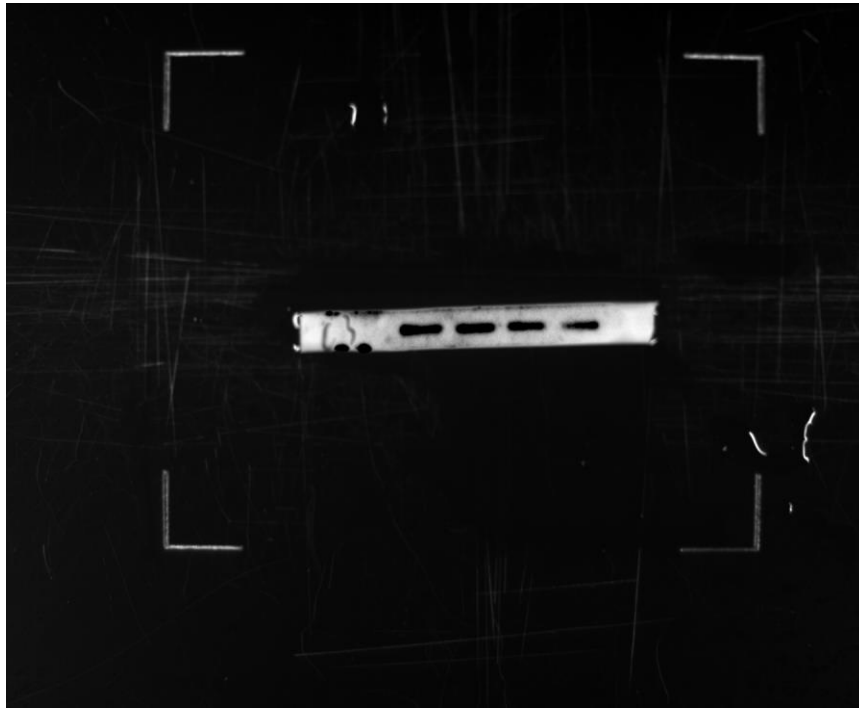

CON CON CON  
TNF- $\alpha$ (ng/ml) 0 100 100  
TAK715( $\mu$ M) 0 0 5

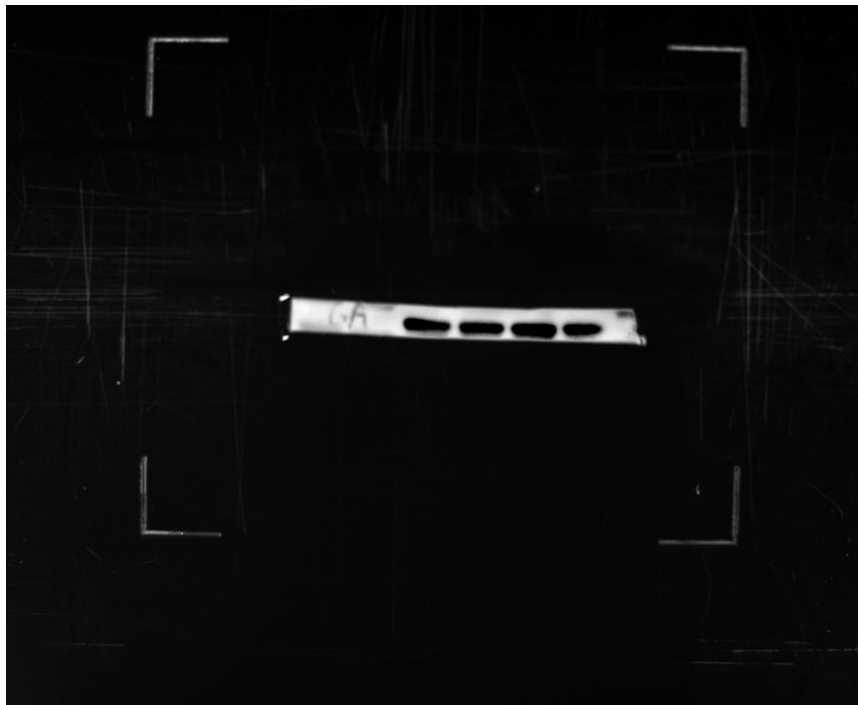

Supplement: 12891_2024_8068_MOESM2_ESM.pdf [file 12891_2024_8068_MOESM2_ESM.pdf]
